# Supplementary material for: Multiple stable redox states and tunable ground states via the marriage of viologens and Chichibabin's hydrocarbon
Source: Royal Society of Chemistry journal article supplement (doi:10.1039/d3sc00102d), 2023-01-01
Supplement: d3sc00102d1.pdf [file d3sc00102d1.pdf]

# Multiple stable redox states and tunable ground states via the marriage of Viologens and Chichibabin's hydrocarbon

Yuyang Dai,<sup>‡a</sup> Zhuofeng Xie,<sup>‡a</sup> Manling Bao,<sup>a</sup> Chunmeng Liu<sup>a</sup> and Yuanting Su<sup>\*a,b</sup>

<sup>a</sup>College of Chemistry, Chemical Engineering and Materials Science, School of Radiation Medicine and Protection, Soochow University, Suzhou 215123, China.

<sup>b</sup>State Key Laboratory of Coordination Chemistry, Nanjing University, Nanjing 210023, China.

E-mail: ytsu@suda.edu.cn

<sup>‡</sup> Y. Dai and Z. Xie contributed equally.

## Contents

|                                                      |     |
|------------------------------------------------------|-----|
| 1. Synthesis and spectra data of new compounds ..... | S2  |
| 2. Crystal structural parameters .....               | S14 |
| 3. VT-EPR spectra of <b>2</b> in toluene .....       | S20 |
| 4. Theoretical calculations .....                    | S20 |
| 5. Coordinates of the studied molecules .....        | S29 |
| 6. References .....                                  | S46 |

## 1. Synthesis and spectra data of new compounds

**General considerations:** All experiments were carried out under nitrogen atmosphere using standard Schlenk or dry glovebox techniques. Solvents were dried by standard methods and stored in activated 4 Å molecule sieve in the glovebox.  $^1\text{H}$ ,  $^{13}\text{C}\{^1\text{H}\}$ ,  $^{11}\text{B}\{^1\text{H}\}$ ,  $^{19}\text{F}$  and  $^{27}\text{Al}$  NMR spectra were obtained with a Bruker AVIII 400 MHz spectrometer. Chemical shifts ( $\delta$ ) are given in p.p.m. Coupling constants  $J$  are given in Hz. NMR multiplicities are abbreviated as follows: s = singlet, d = doublet, t = triplet, s = septet, m = multiplet, br = broad signal. UV-vis spectra were recorded on the Lambda 750 spectrometer at room temperature. EPR spectra were obtained using JEOL JES-X320 X-band apparatus. Element analyses were performed on an ElementarVario EL III instrument. Commercially available reagents were purchased from Energy Chemical and used as received. Bromoborane  $(\text{HCNDipp})_2\text{BBr}^{\text{S1}}$  (Dipp = 2,6-diisopropyl) and 3,3',5,5'-tetramethyl-4,4'-bipyridine $^{\text{S2}}$  were synthesized according to the literature procedures.

### Synthesis of **1**

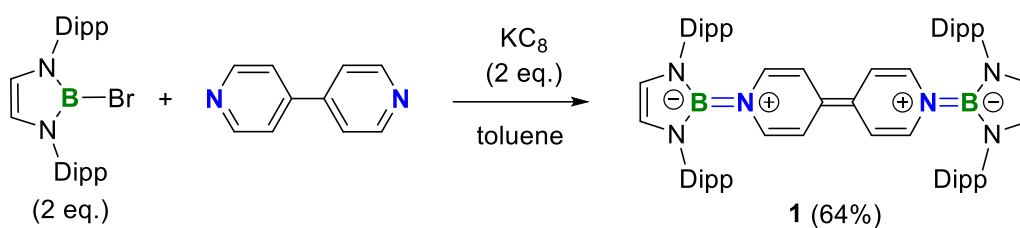

Potassium graphite (0.70 g, 5.2 mmol) was added to the toluene (50 mL) solution of  $(\text{HCNDipp})_2\text{BBr}$  (2.34 g, 5.0 mmol) and 4,4'-bipyridine (0.39 g, 2.5 mmol) at room temperature. After stirring for about twenty minutes, the color of the solution changed from yellow to brown and the mixture was stirred for 24 h. After filtration, the precipitation was extracted with THF (25 mL $\times$ 2). The solvent was removed under vacuum and the residue was washed with hexane (20 mL) to afford **1** as an orange powder (1.48 g, 64%). Single crystals of **1** suitable for X-ray diffraction studies were grown from the THF/hexane solution at room temperature.  $^1\text{H}$  NMR (THF- $d_8$ , 300 MHz, 298 K):  $\delta$  7.26–7.23 (m, 4H, Ar- $H$ ), 7.18–7.16 (m, 8H, Ar- $H$ ), 5.99 (s, 4H, CH

=CH), 5.35 (d,  $J = 6.0$  Hz, 4H, CH=CH), 4.89 (d,  $J = 6.0$  Hz, 4H, CH=CH), 3.08 (sep, 8H, (CH<sub>3</sub>)<sub>2</sub>CH), 1.17 (d,  $J = 6.0$  Hz, 24H, CH (CH<sub>3</sub>)<sub>2</sub>), 1.16 (d,  $J = 6.0$  Hz, 24H, CH (CH<sub>3</sub>)<sub>2</sub>); <sup>13</sup>C{<sup>1</sup>H} NMR (THF-d<sub>8</sub>, 400 MHz, 298 K): δ 146.64 (Ar-C), 139.52 (Ar-C), 128.21 (Ar-CH), 126.38 (CH=CH), 124.16 (Ar-CH), 118.98 (CH=CH), 110.05 (C=C), 108.97 (CH=CH), 29.05 ((CH<sub>3</sub>)<sub>2</sub>CH), 24.50 ((CH<sub>3</sub>)<sub>2</sub>CH), 23.50 ((CH<sub>3</sub>)<sub>2</sub>CH); <sup>11</sup>B{<sup>1</sup>H} NMR (THF-d<sub>8</sub>, 128 MHz, 298 K): δ 22.63 ppm; UV-vis (toluene): λ<sub>max</sub> = 411 nm; Elemental analysis for C<sub>62</sub>H<sub>80</sub>B<sub>2</sub>N<sub>6</sub> (%): Calculated: C 79.99, H 8.66, N 9.03; Found: C 80.13, H 8.71, N 8.88.

### Synthesis of **1**<sup>+</sup>[SbF<sub>6</sub>]<sup>-</sup>

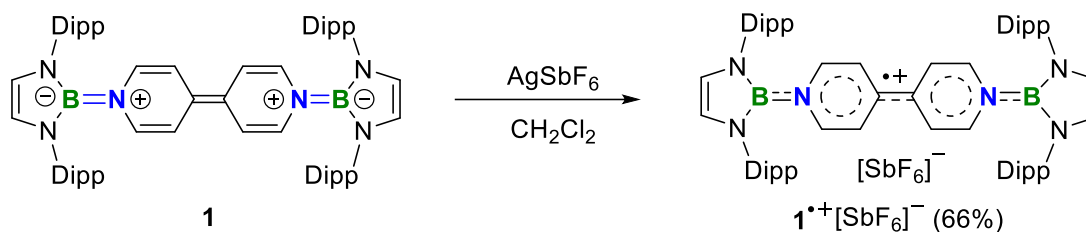

A 10 mL dichloromethane solution of AgSbF<sub>6</sub> (0.16 g, 0.48 mmol) was added dropwise into a dichloromethane (10 mL) solution of **1** (0.44 g, 0.48 mmol) at -30 °C. The color of the solution changed immediately from orange to purple. After slowly warm up to room temperature and stirring overnight, the solvent was removed under vacuum and the resulting residue was washed with hexane (10 ml). After filtration and removal of the solvent, **1**<sup>+</sup>[SbF<sub>6</sub>]<sup>-</sup> was obtained as an indigo powder (0.36 g, 66%). Single crystals of **1**<sup>+</sup>[SbF<sub>6</sub>]<sup>-</sup> suitable for X-ray diffraction studies were grown from the DCM/hexane solution at room temperature. UV-vis (DCM): λ<sub>max</sub> = 564, 620, and 687 nm; Elemental analysis for C<sub>62</sub>H<sub>80</sub>B<sub>2</sub>F<sub>6</sub>N<sub>6</sub>Sb (%): Calculated: C 63.83, H 6.91, N 7.20; Found: C 63.61, H 6.79, N 7.32.

### Synthesis of $1^{2+} 2[\text{Al}(\text{OC}(\text{CF}_3)_3)_4]^-$

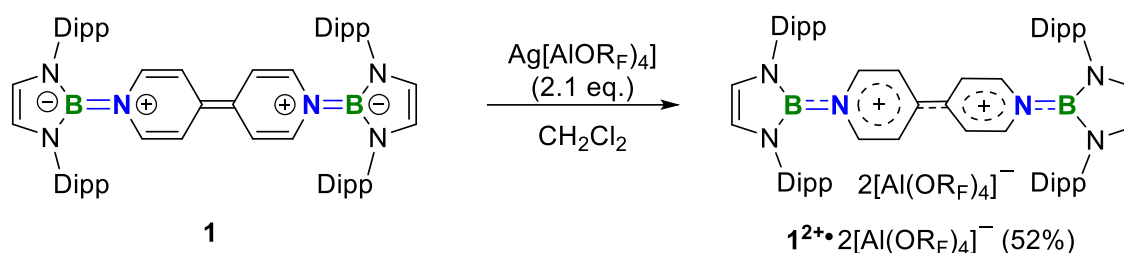

A 10 mL dichloromethane solution of  $\text{Ag}[\text{Al}(\text{OR}_\text{F})_4]$  ( $\text{RF} = \text{C}(\text{CF}_3)_3$ ) (0.49 g, 0.45 mmol) was added dropwise into a dichloromethane (10 mL) solution of **1** (0.20 g, 0.22 mmol) at  $-78^\circ\text{C}$ . After slowly warm up to room temperature and stirring overnight, the solvent was removed under vacuum and the resulting residue was extracted with toluene (15 ml). After filtration and removal of the solvent,  $1^{2+} 2[\text{Al}(\text{OC}(\text{CF}_3)_3)_4]^-$  was obtained as an indigo powder (0.32 g, 52%). Single crystals of  $1^{2+} 2[\text{Al}(\text{OC}(\text{CF}_3)_3)_4]^-$  suitable for X-ray diffraction studies were grown from mixture DCM/hexane solution at room temperature.  $^1\text{H}$  NMR ( $\text{CD}_2\text{Cl}_2$ , 400 MHz, 298 K):  $\delta$  8.23 (d,  $J = 8.0$  Hz, 4H,  $\text{CH}=\text{CH}$ ), 7.80 (d,  $J = 4.0$  Hz, 4H,  $\text{CH}=\text{CH}$ ), 7.55 (t,  $J = 8.0$  Hz, 4H, Ar-CH), 7.40 (d,  $J = 8.0$  Hz, 8H, Ar-CH), 6.68 (s, 4H,  $\text{CH}=\text{CH}$ ), 2.79 (sep, 8H,  $(\text{CH}_3)_2\text{CH}$ ), 1.26 (d,  $J = 8.0$  Hz, 24H,  $(\text{CH}_3)_2\text{CH}$ ), 0.96 (d,  $J = 8.0$  Hz, 24H,  $(\text{CH}_3)_2\text{CH}$ );  $^{13}\text{C}\{^1\text{H}\}$  NMR ( $\text{CD}_2\text{Cl}_2$ , 100 MHz, 298 K):  $\delta$  148.98 (Ar-C), 145.16 (Ar-C), 144.73 (Ar-CH), 133.91 ( $\text{C}=\text{C}$ ), 131.18 (Ar-CH), 126.54 ( $\text{CH}=\text{CH}$ ), 126.15 ( $\text{CH}=\text{CH}$ ), 123.15 ( $\text{CH}=\text{CH}$ ), 120.19 ( $\text{CF}_3$ ), 117.23 ( $\text{C}(\text{CF}_3)_3$ ), 29.30 ( $(\text{CH}_3)_2\text{CH}$ ), 24.65 ( $(\text{CH}_3)_2\text{CH}$ ), 23.40 ( $(\text{CH}_3)_2\text{CH}$ );  $^{11}\text{B}\{^1\text{H}\}$  NMR ( $\text{CD}_2\text{Cl}_2$ , 128 MHz, 298 K):  $\delta$  19.55 ppm;  $^{19}\text{F}$  NMR ( $\text{CD}_2\text{Cl}_2$ , 377 MHz, 298 K):  $\delta$  -75.62 ppm;  $^{27}\text{Al}$  NMR ( $\text{CD}_2\text{Cl}_2$ , 104 MHz, 298 K):  $\delta$  34.63 ppm; UV-vis (DCM):  $\lambda_{\text{max}} = 580$  nm; Elemental analysis for  $\text{C}_{94}\text{H}_{80}\text{Al}_2\text{B}_2\text{F}_{72}\text{N}_6\text{O}_8$  (%): Calculated: C 39.41, H 2.81, N 2.93, O 4.47; Found: C 39.70, H 2.99, N 2.79, O 4.35.

## Synthesis of **2**

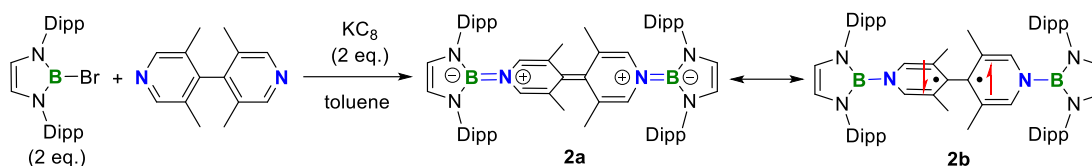

Potassium graphite (0.33 g, 2.43 mmol) was added to the toluene (20 mL) solution of  $(\text{HCNDipp})_2\text{BBr}$  (0.57 g, 1.21 mmol) and 3,3',5,5'-tetramethyl-4,4'-bipyridine (0.13 g, 0.61 mmol) at room temperature. After stirring for about twenty minutes, the color of the solution changed from yellow to purple and stirred for 24 h. After filtration, the precipitation was extracted with toluene (10 mL $\times$ 2). The solvent was removed under vacuum and the residue was recrystallization with hexane to afford **2** as a purple powder (0.30 g, 49%). Single crystals of **2** suitable for X-ray diffraction studies were grown from its saturated hexane solution at room temperature.  $^1\text{H}$  NMR ( $\text{C}_6\text{D}_6$ , 300 MHz, 298 K):  $\delta$  7.20–7.16 (m, 4H, Ar-*H*), 7.10–7.08 (m, 8H, Ar-*H*), 5.95 (s, 4H, CH=C), 5.67 (s, 4H, CH=CH), 3.29 (sep, 8H,  $(\text{CH}_3)_2\text{CH}$ ), 1.32 (s, 12H, CCH<sub>3</sub>), 1.23 (d,  $J = 6.0$  Hz, 24H, CH(CH<sub>3</sub>)<sub>2</sub>), 1.19 (d,  $J = 6.0$  Hz, 24H, CH(CH<sub>3</sub>)<sub>2</sub>);  $^{13}\text{C}\{^1\text{H}\}$  NMR ( $\text{C}_6\text{D}_6$ , 400 MHz, 298 K):  $\delta$  146.38 (Ar-C), 139.39 (Ar-C), 127.98 (Ar-CH), 124.85 (CH=C), 124.01 (C=C), 123.91 (Ar-CH), 118.71 (CH=CH), 119.60 (CH=C), 28.76 ( $(\text{CH}_3)_2\text{CH}$ ), 24.75 ( $(\text{CH}_3)_2\text{CH}$ ), 23.53 ( $(\text{CH}_3)_2\text{CH}$ ), 19.24 (CCH<sub>3</sub>);  $^{11}\text{B}\{^1\text{H}\}$  NMR ( $\text{C}_6\text{D}_6$ , 128 MHz, 298 K):  $\delta$  21.53 ppm; UV-vis (toluene):  $\lambda_{\text{max}} = 527$  nm; Elemental analysis for  $\text{C}_{66}\text{H}_{88}\text{B}_2\text{N}_6$  (%): Calculated: C 80.31, H 8.99, N 8.51; Found: C 80.50, H 9.06, N 8.32.

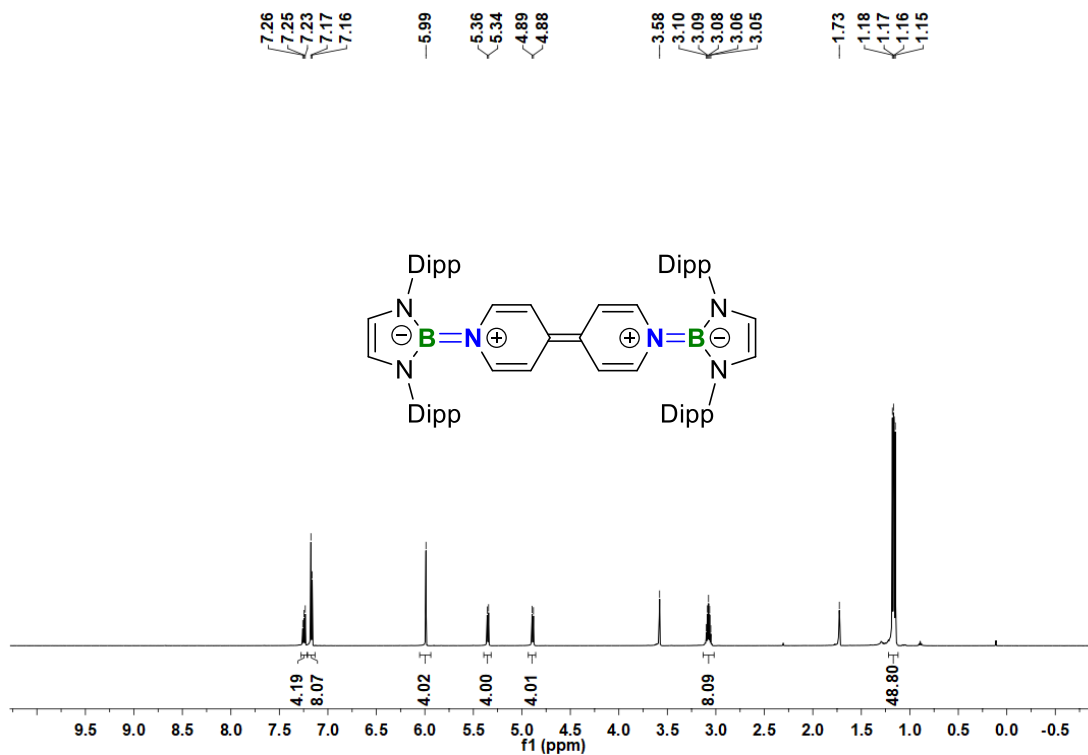

Fig. S1 <sup>1</sup>H NMR spectrum of **1** in THF-D<sub>8</sub> at 298 K.

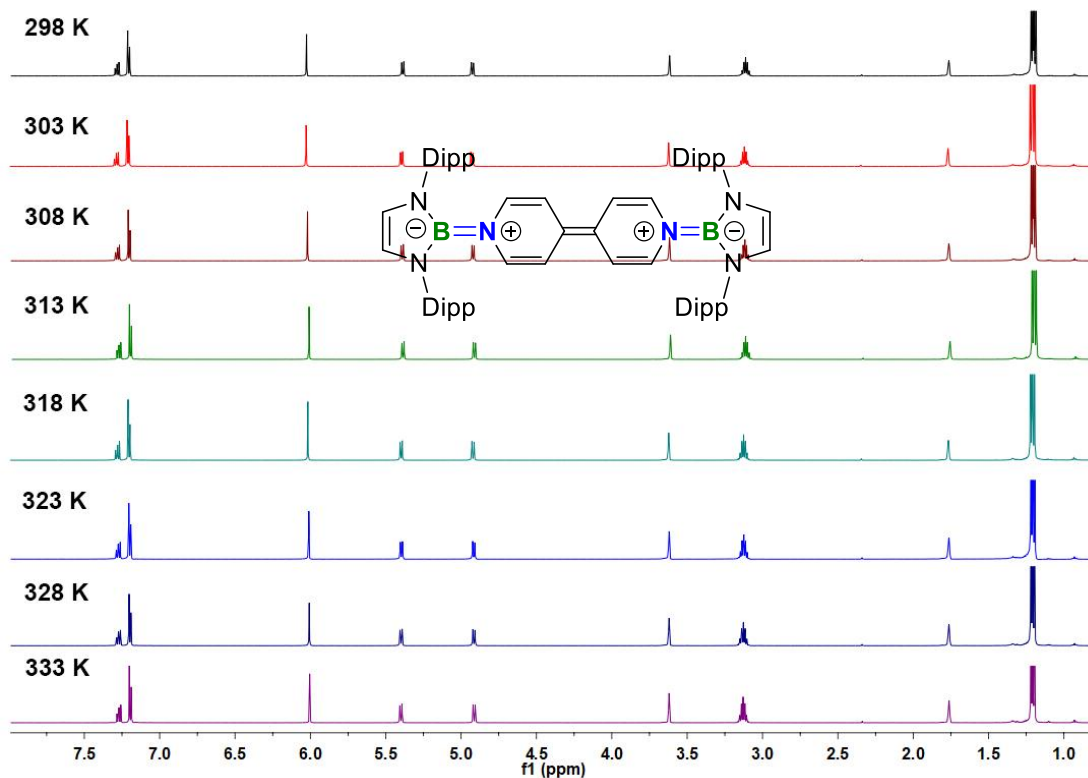

Fig. S2 <sup>1</sup>H VT-NMR spectrum of **1** in THF-D<sub>8</sub>.

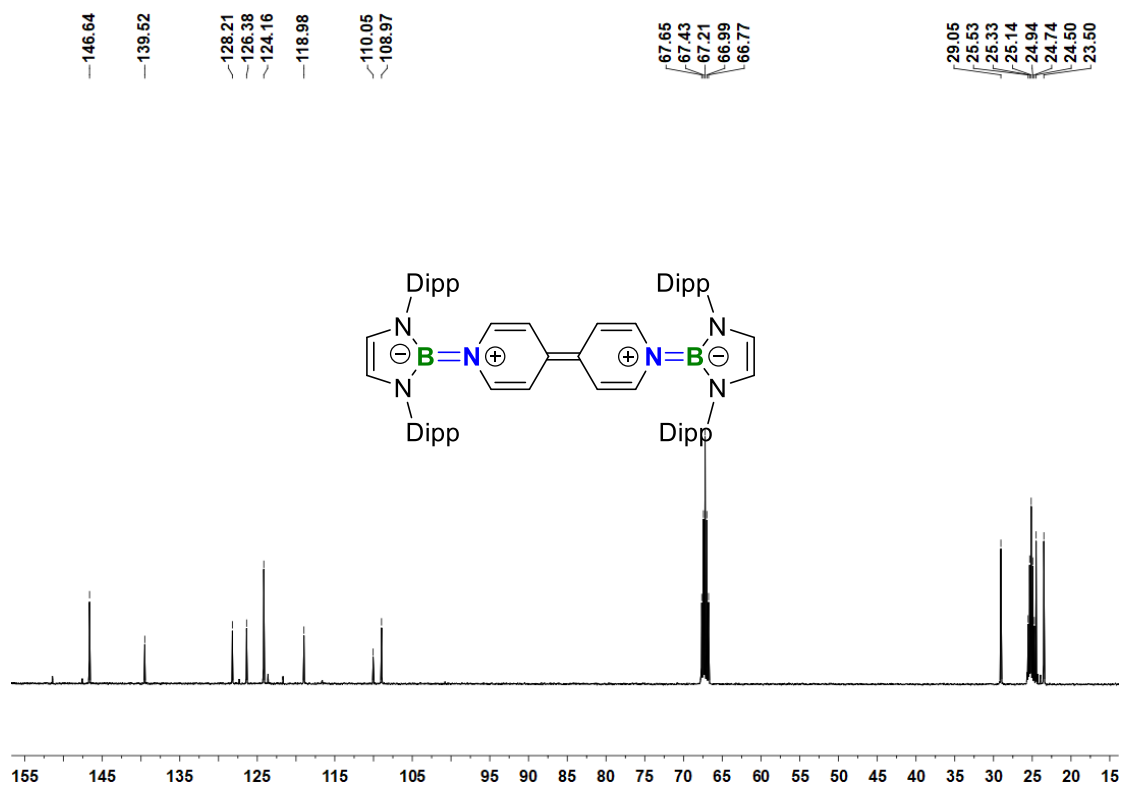

**Fig. S3**  $^{13}\text{C}\{^1\text{H}\}$  NMR spectrum of **1** in THF- $\text{D}_8$  at 298 K.

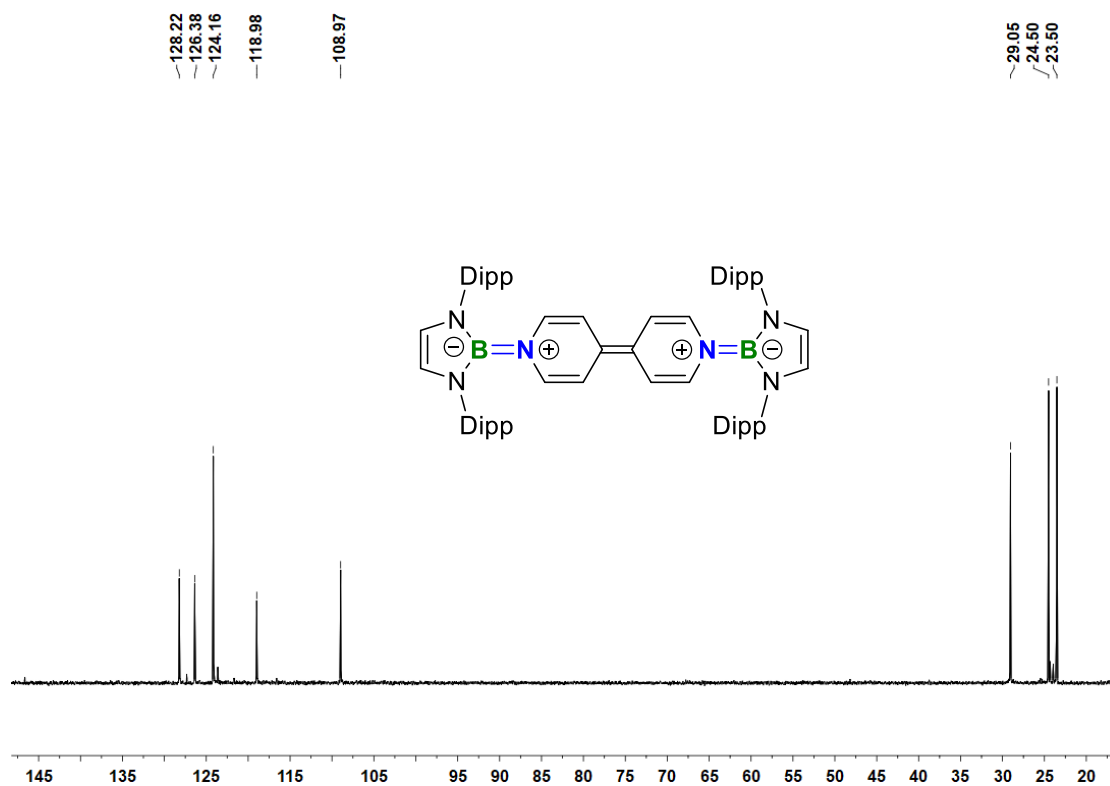

**Fig. S4**  $^{13}\text{C}\{\text{DEPT135}\}$  NMR spectrum of **1** in THF- $\text{D}_8$  at 298 K.

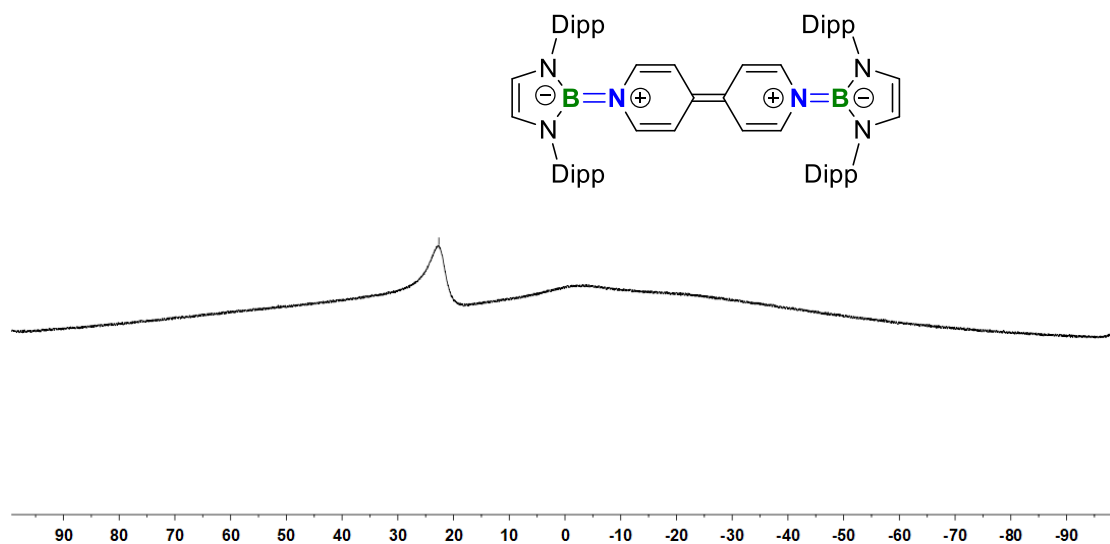

Fig. S5  $^{11}\text{B}\{^1\text{H}\}$  NMR spectrum of **1** in THF- $\text{D}_8$  at 298 K.

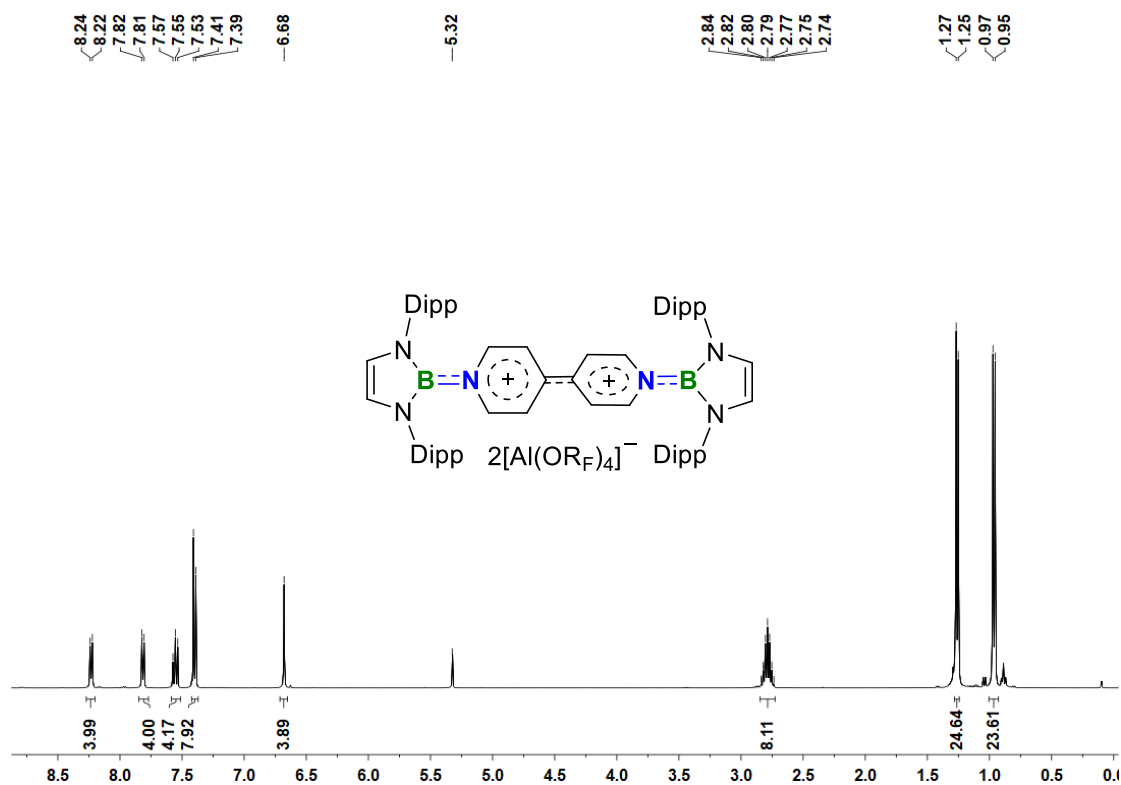

Fig. S6  $^1\text{H}$  NMR spectrum of  $\mathbf{1}^{2+} \mathbf{2}[\text{Al}(\text{OC}(\text{CF}_3)_3)_4]^-$  in  $\text{CD}_2\text{Cl}_2$  at 298 K.



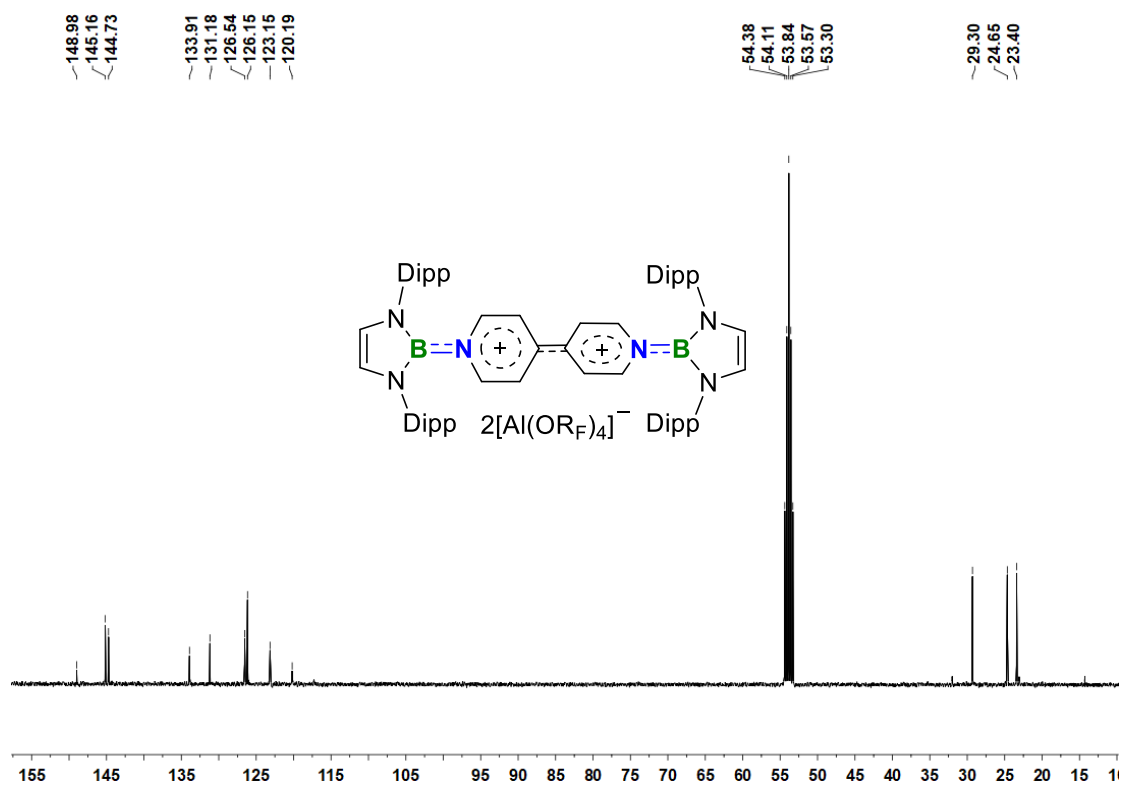

**Fig. S7**  $^{13}\text{C}\{^1\text{H}\}$  NMR spectrum of  $1^{2+} 2[\text{Al}(\text{OC}(\text{CF}_3)_3)_4]^-$  in  $\text{CD}_2\text{Cl}_2$  at 298 K.

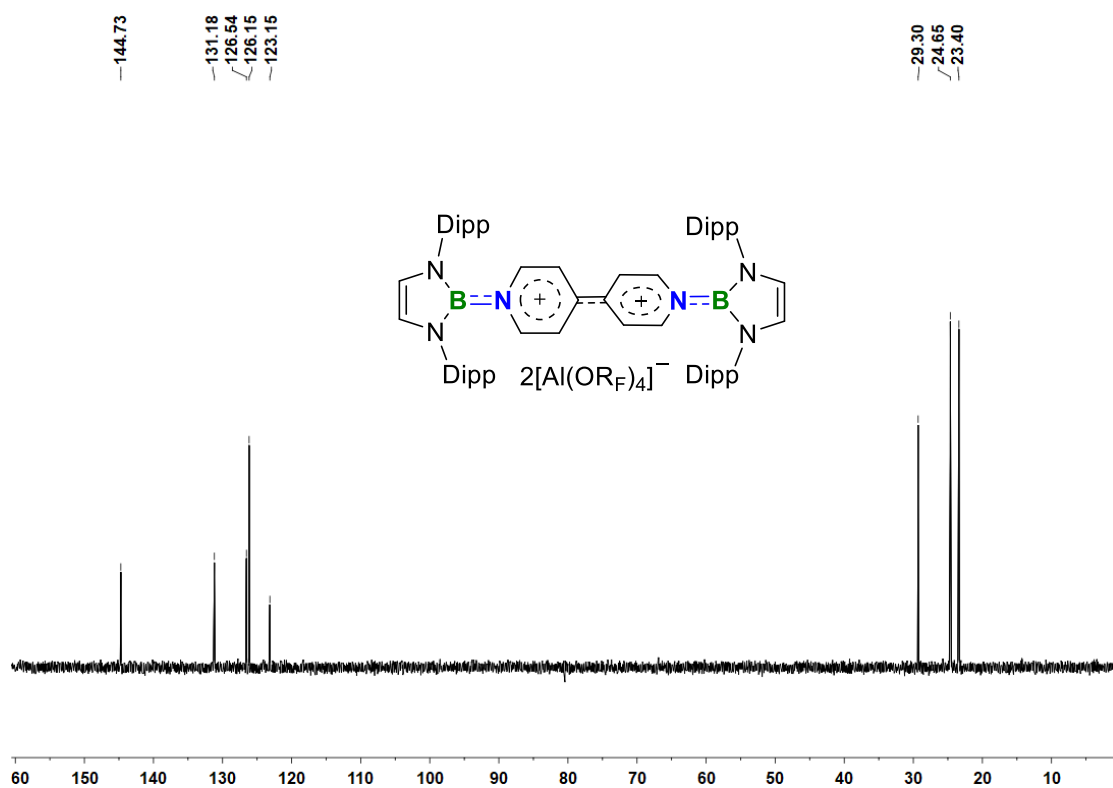

**Fig. S8**  $^{13}\text{C}\{\text{DEPT135}\}$  NMR spectrum of  $1^{2+} 2[\text{Al}(\text{OC}(\text{CF}_3)_3)_4]^-$  in  $\text{CD}_2\text{Cl}_2$  at 298 K.

-19.55

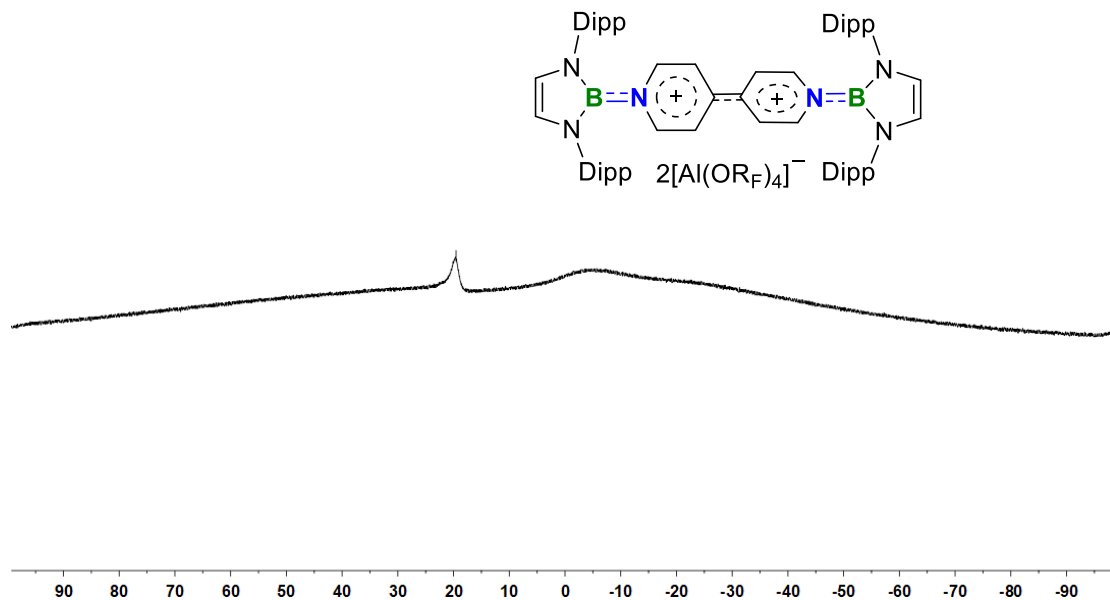

**Fig. S9**  $^{11}\text{B}\{^1\text{H}\}$  NMR spectrum of  $1^{2+} \cdot 2[\text{Al}(\text{OC}(\text{CF}_3)_3)_4]^-$  in  $\text{CD}_2\text{Cl}_2$  at 298 K.

-34.63

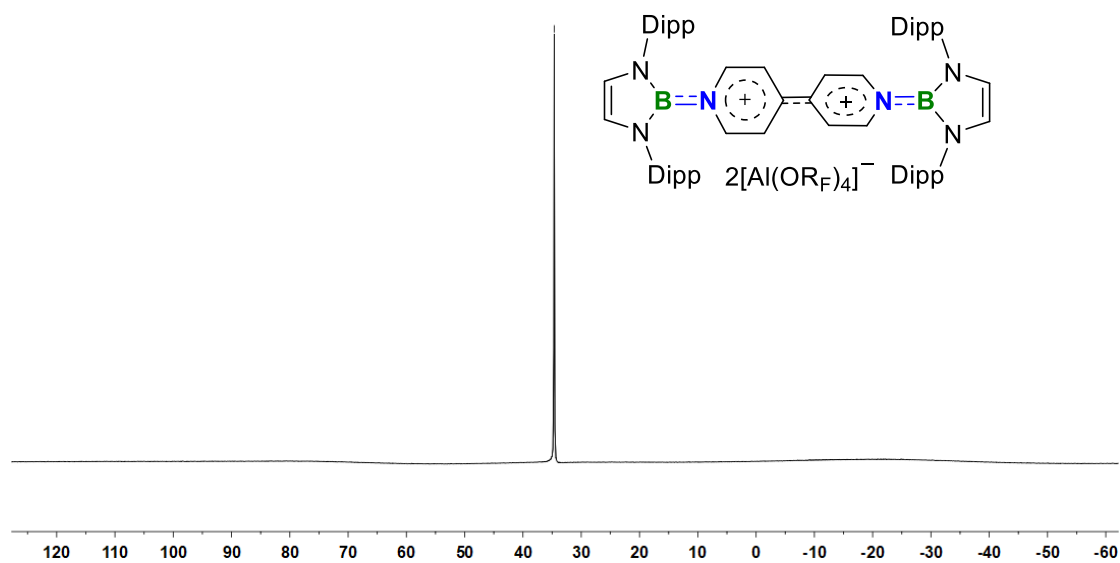

**Fig. S10**  $^{27}\text{Al}$  NMR spectrum of  $1^{2+} \cdot 2[\text{Al}(\text{OC}(\text{CF}_3)_3)_4]^-$  in  $\text{CD}_2\text{Cl}_2$  at 298 K.

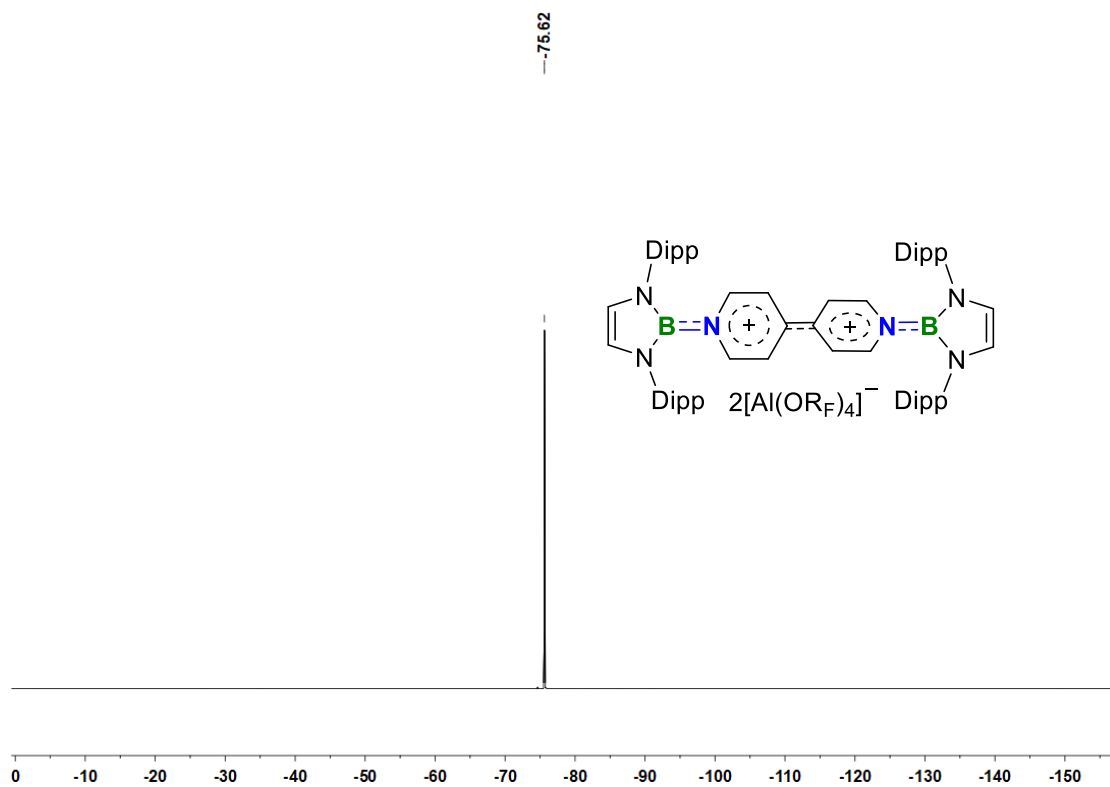

**Fig. S11** <sup>19</sup>F NMR spectrum of **1**<sup>2+</sup> 2[Al(OC(CF<sub>3</sub>)<sub>3</sub>)<sub>4</sub>]<sup>-</sup> in CD<sub>2</sub>Cl<sub>2</sub> at 298 K.

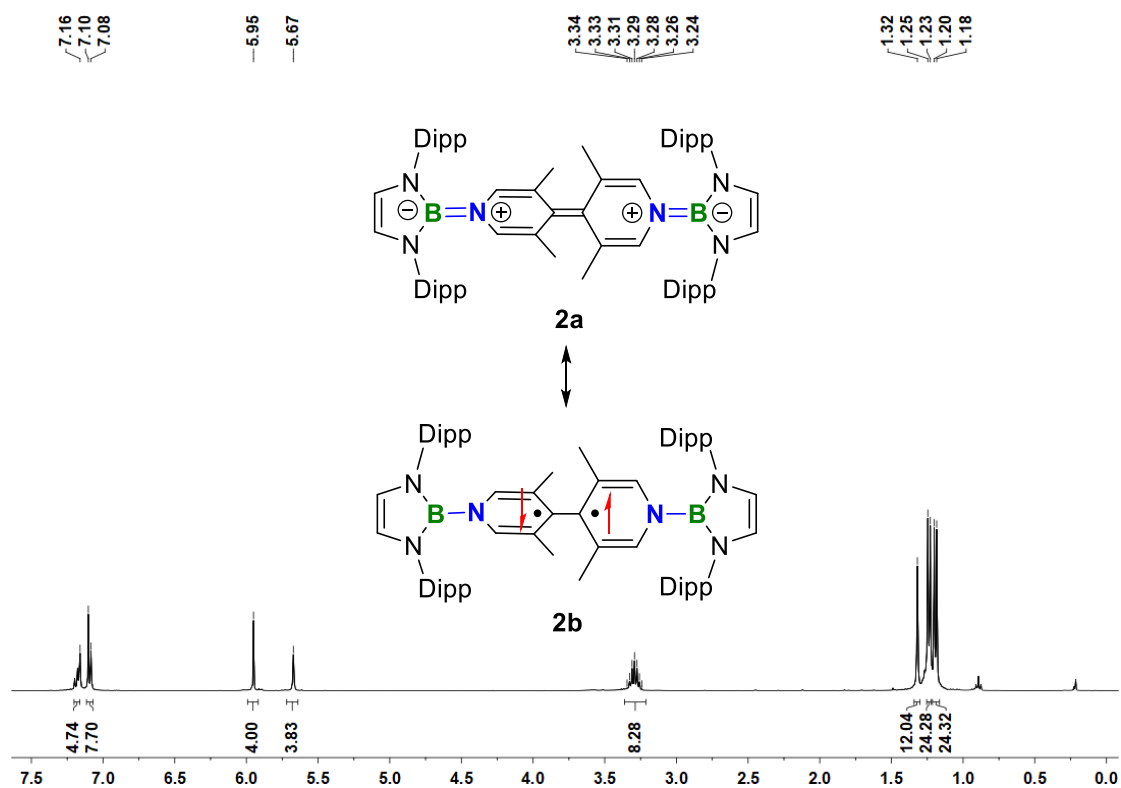

**Fig. S12** <sup>1</sup>H NMR spectrum of **2** in C<sub>6</sub>D<sub>6</sub> at 298 K.

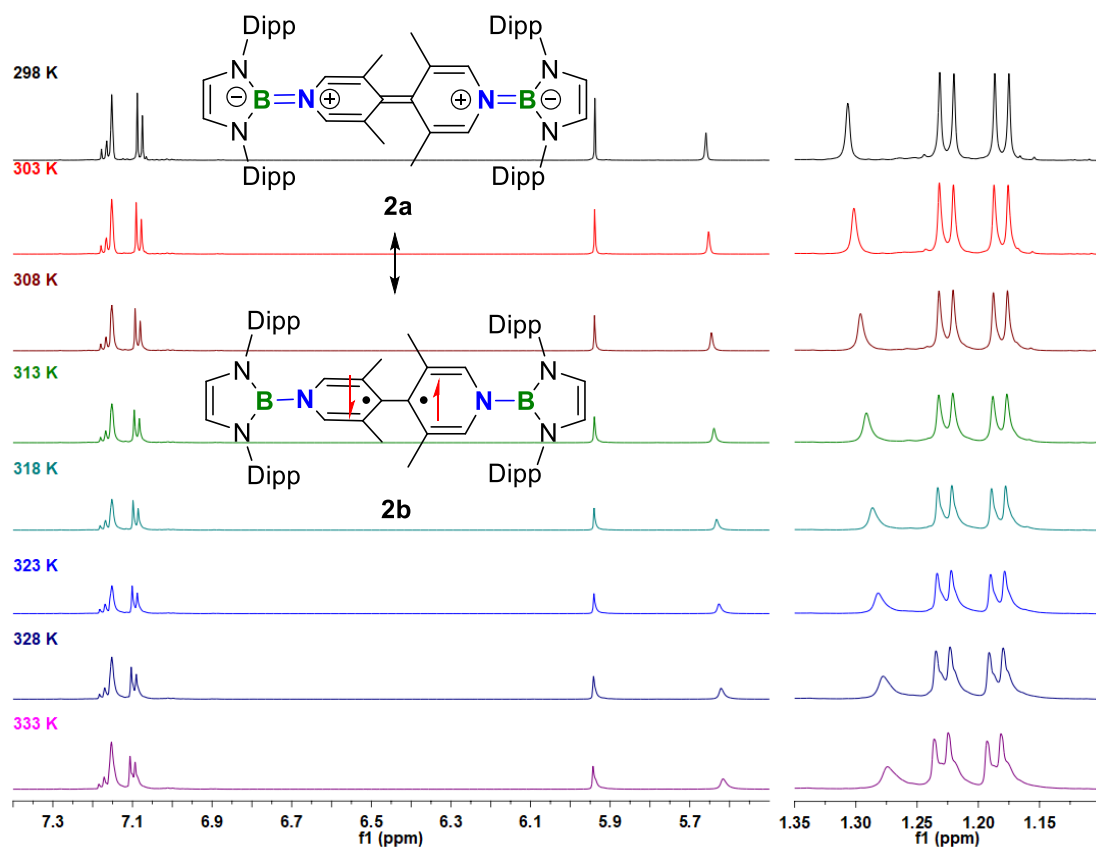

Fig. S13  $^1\text{H}$  VT-NMR spectrum of **2** in  $\text{THF-D}_8$ .

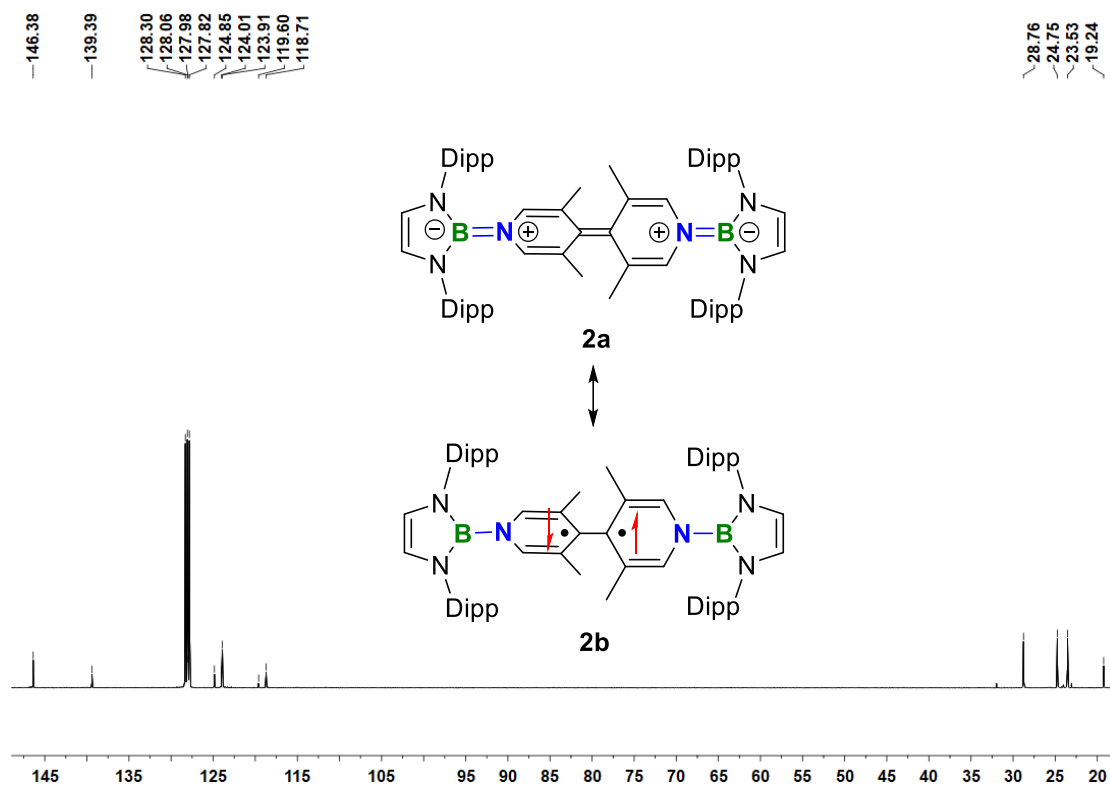

Fig. S14  $^{13}\text{C}\{^1\text{H}\}$  NMR spectrum of **2** in  $\text{C}_6\text{D}_6$  at 298 K.

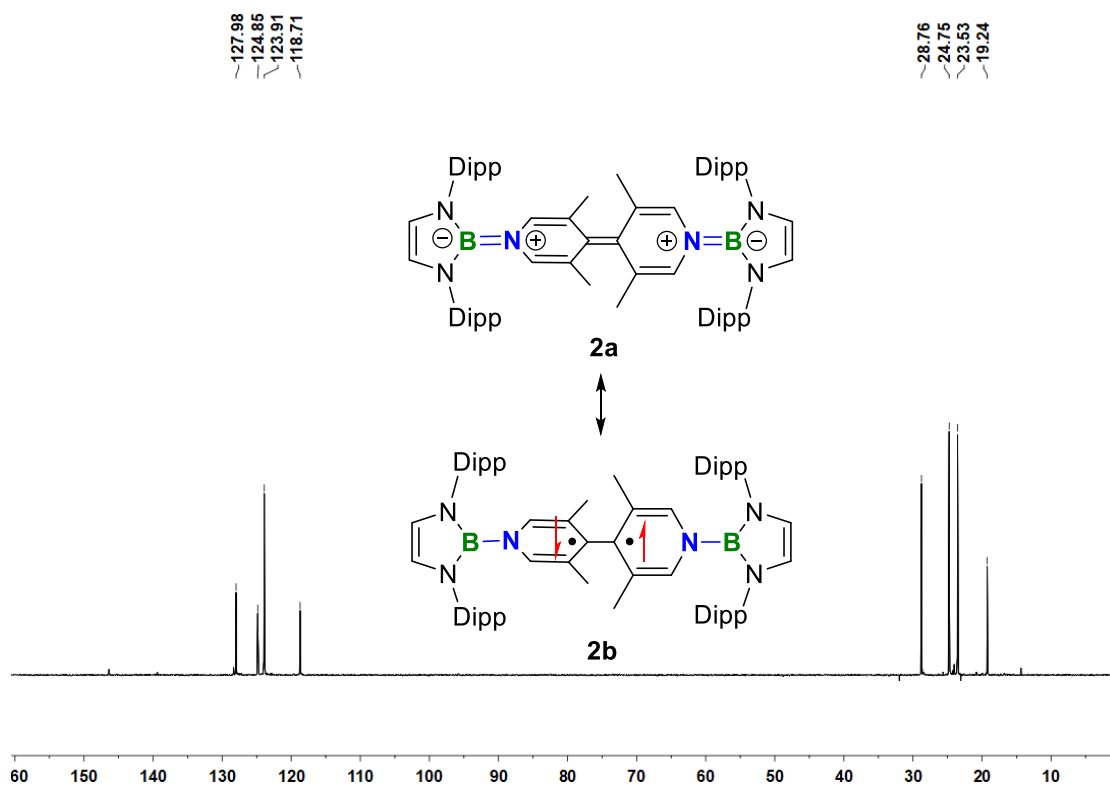

Fig. S15  $^{13}\text{C}\{\text{DEPT135}\}$  NMR spectrum of **2** in  $\text{C}_6\text{D}_6$  at 298 K.

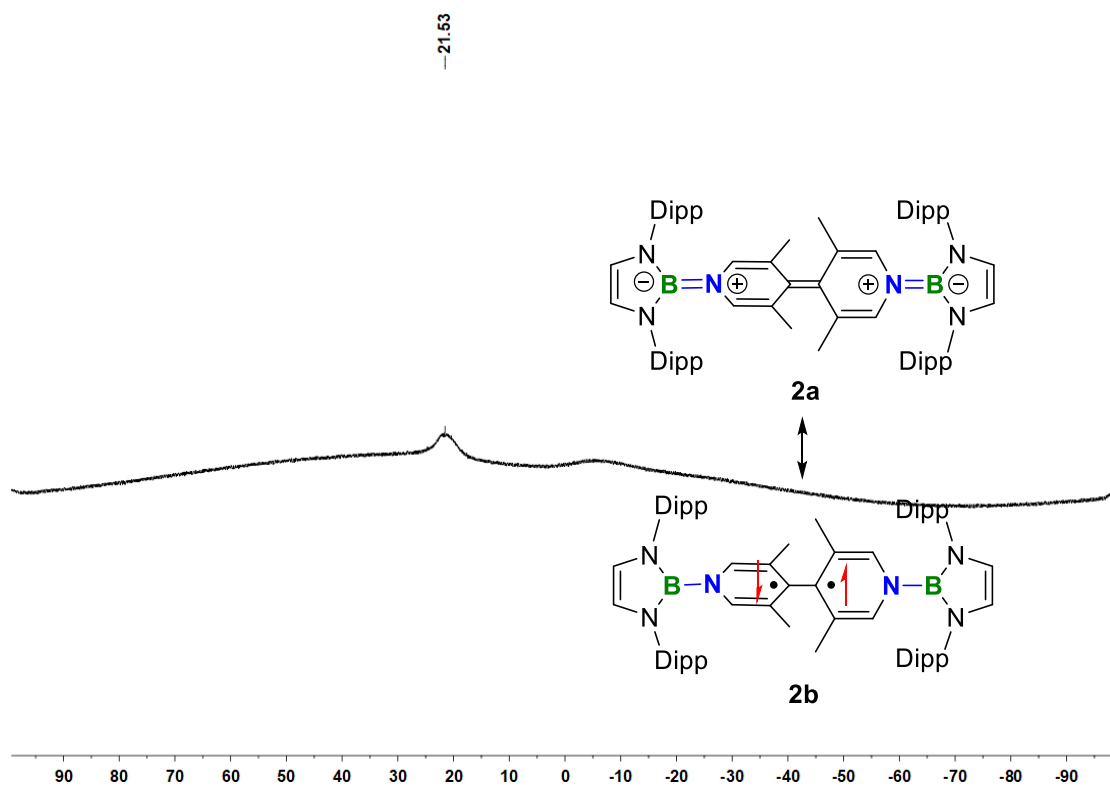

Fig. S16  $^{11}\text{B}\{^1\text{H}\}$  NMR spectrum of **2** in  $\text{C}_6\text{D}_6$  at 298 K.

## 2. Crystal structural parameters

For the single crystal X-ray structure analyses the crystals were each mounted on a glass capillary in perfluorinated oil and measured in a cold N<sub>2</sub> flow. The data for all compounds were collected on the Bruker D8 CMOS detector at low temperatures. Using Olex2,<sup>S3</sup> the structures were solved with the SHELXT<sup>S4</sup> structure solution program and refined with the SHELXLS4 refinement package. The positions of the H atoms were calculated and considered isotropically according to a riding model. CCDC: 2205846–2205849 contain the supplementary crystallographic data for this paper. The data can be obtained free of charge from the Cambridge Crystallography Data Center via [www.ccdc.cam.ac.uk/data\\_request/cif](http://www.ccdc.cam.ac.uk/data_request/cif)

**Table S1.** Summary of data collection and structure refinement.

| Compounds                                                | <b>1</b> •C <sub>6</sub> H <sub>6</sub>                       | <b>1</b> <sup>+</sup> [SbF <sub>6</sub> ] <sup>-</sup>                          | <b>1</b> <sup>2+</sup> • <b>2</b> [Al(OC(CF <sub>3</sub> ) <sub>3</sub> ) <sub>4</sub> ] <sup>-</sup> • <b>2</b> C <sub>7</sub> H <sub>8</sub> | <b>2</b>                                                      |
|----------------------------------------------------------|---------------------------------------------------------------|---------------------------------------------------------------------------------|------------------------------------------------------------------------------------------------------------------------------------------------|---------------------------------------------------------------|
| CCDC                                                     | 2205846                                                       | 2205848                                                                         | 2205849                                                                                                                                        | 2205847                                                       |
| Formula                                                  | C <sub>68</sub> H <sub>86</sub> B <sub>2</sub> N <sub>6</sub> | C <sub>62</sub> H <sub>80</sub> B <sub>2</sub> F <sub>6</sub> N <sub>6</sub> Sb | C <sub>108</sub> H <sub>96</sub> Al <sub>2</sub> B <sub>2</sub> F <sub>72</sub> N <sub>6</sub> O <sub>8</sub>                                  | C <sub>66</sub> H <sub>88</sub> B <sub>2</sub> N <sub>6</sub> |
| F <sub>w</sub>                                           | 1009.04                                                       | 1166.69                                                                         | 3049.48                                                                                                                                        | 987.04                                                        |
| Crystal syst                                             | triclinic                                                     | triclinic                                                                       | monoclinic                                                                                                                                     | monoclinic                                                    |
| Space group                                              | P-1                                                           | P-1                                                                             | P21/c                                                                                                                                          | C2/c                                                          |
| Size, mm <sup>3</sup>                                    | 0.1 × 0.12 × 0.15                                             | 0.1 × 0.11 × 0.16                                                               | 0.2 × 0.22 × 0.24                                                                                                                              | 0.13 × 0.16 × 0.18                                            |
| T, K                                                     | 131.0                                                         | 138.0                                                                           | 120.0                                                                                                                                          | 135.0                                                         |
| a, Å                                                     | 9.3498(8)                                                     | 9.7065(10)                                                                      | 24.7100(12)                                                                                                                                    | 32.041(3)                                                     |
| b, Å                                                     | 11.4321(10)                                                   | 10.4206(11)                                                                     | 21.2756(10)                                                                                                                                    | 12.9784(11)                                                   |
| c, Å                                                     | 15.5813(14)                                                   | 16.6116(17)                                                                     | 24.7191(12)                                                                                                                                    | 16.7286(14)                                                   |
| α, deg                                                   | 69.242(2)                                                     | 73.769(4)                                                                       | 90                                                                                                                                             | 90                                                            |
| β, deg                                                   | 84.549(2)                                                     | 73.502(4)                                                                       | 98.219(2)                                                                                                                                      | 117.642(2)                                                    |
| γ, deg                                                   | 77.162(2)                                                     | 79.487(4)                                                                       | 90                                                                                                                                             | 90                                                            |
| V, Å <sup>3</sup>                                        | 1518.2(2)                                                     | 1537.1(3)                                                                       | 12861.8(11)                                                                                                                                    | 6162.5(9)                                                     |
| Z                                                        | 1                                                             | 1                                                                               | 4                                                                                                                                              | 4                                                             |
| dcalcd, g•cm <sup>-3</sup>                               | 1.104                                                         | 1.260                                                                           | 1.575                                                                                                                                          | 1.064                                                         |
| μ, mm <sup>-1</sup>                                      | 0.310                                                         | 2.715                                                                           | 1.067                                                                                                                                          | 0.298                                                         |
| Reflections collected                                    | 22537                                                         | 20897                                                                           | 204947                                                                                                                                         | 33194                                                         |
| Independent reflections                                  | 5342                                                          | 5571                                                                            | 203898                                                                                                                                         | 5595                                                          |
| [R <sub>int</sub> ]                                      | 0.0466                                                        | 0.0750                                                                          | 0.0815                                                                                                                                         | 0.0665                                                        |
| R <sub>1</sub> [I > 2σ(I)]                               | 0.0550                                                        | 0.0637                                                                          | 0.1444                                                                                                                                         | 0.0644                                                        |
| wR <sub>2</sub> [I > 2σ(I)]                              | 0.1395                                                        | 0.1782                                                                          | 0.3288                                                                                                                                         | 0.1693                                                        |
| R <sub>1</sub> [all data]                                | 0.0567                                                        | 0.0690                                                                          | 0.1491 <sup>a</sup>                                                                                                                            | 0.0674                                                        |
| wR <sub>2</sub> [all data]                               | 0.1410                                                        | 0.1815                                                                          | 0.3316 <sup>a</sup>                                                                                                                            | 0.1724                                                        |
| GOF                                                      | 1.043                                                         | 1.089                                                                           | 1.028                                                                                                                                          | 1.063                                                         |
| Largest diff. Peak/hole, e <sup>-</sup> •Å <sup>-3</sup> | 0.45/-0.38                                                    | 2.46/-1.27                                                                      | 1.48/-0.90                                                                                                                                     | 0.58/-0.50                                                    |

<sup>a</sup> This is attributed to highly disordered solvent (toluene) molecules and two [Al(OC(CF<sub>3</sub>)<sub>3</sub>)<sub>4</sub>]<sup>-</sup> anions in the structure. But such a disorder does not affect the structural identification of this dicationic salt, which has been also fully characterized by <sup>1</sup>H, <sup>13</sup>C, <sup>11</sup>B, <sup>19</sup>F, and <sup>27</sup>Al NMR spectra. Additionally, the geometry has been well reproduced by DFT calculations. We believe the key findings of the structural feature of this dicationic salt are unambiguous.

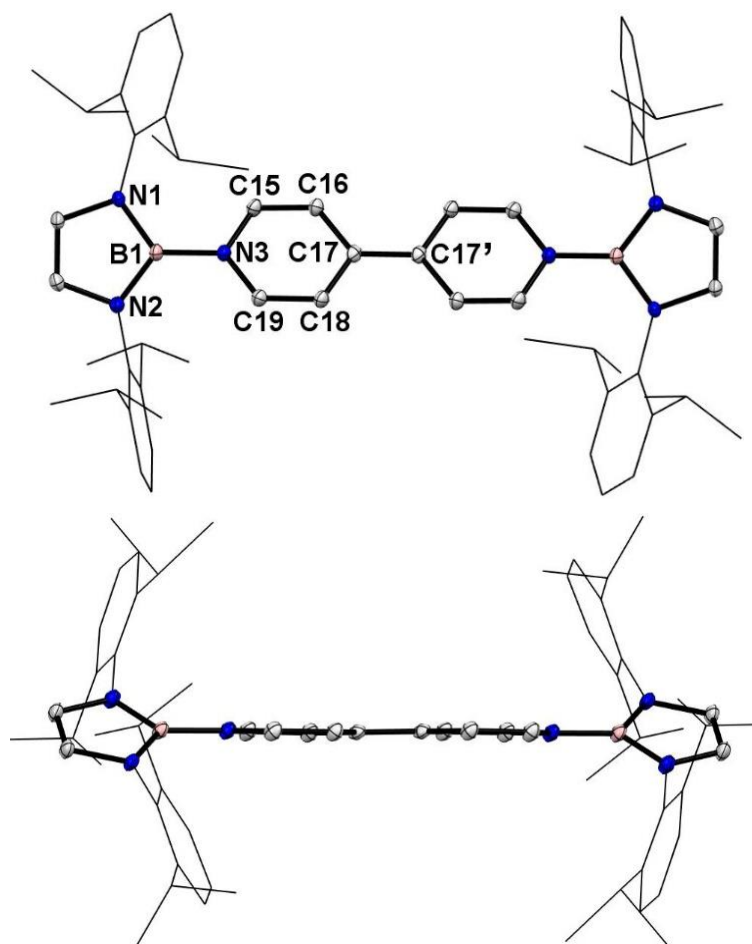

**Fig. S17** Solid-state structures of **1** (top) with side view (bottom). Hydrogen atoms are omitted and Dipp groups are simplified as wireframes for clarity. Thermal ellipsoids are set at the 30% probability level. Selected bond lengths (Å) and angles (°): B1–N1 1.4340(18), B1–N2 1.4326(18), B1–N3 1.4340(18), N3–C15 1.4004(17), N3–C19 1.4028(17), C15–C16 1.3396(19), C18–C19 1.3444(19), C16–C17 1.4579(18), C17–C18 1.4536(18), C17–C17' 1.374(2), N1–B1–N2 105.86(11), N1–B1–N3 128.26(12), N2–B1–N3 125.87(12).



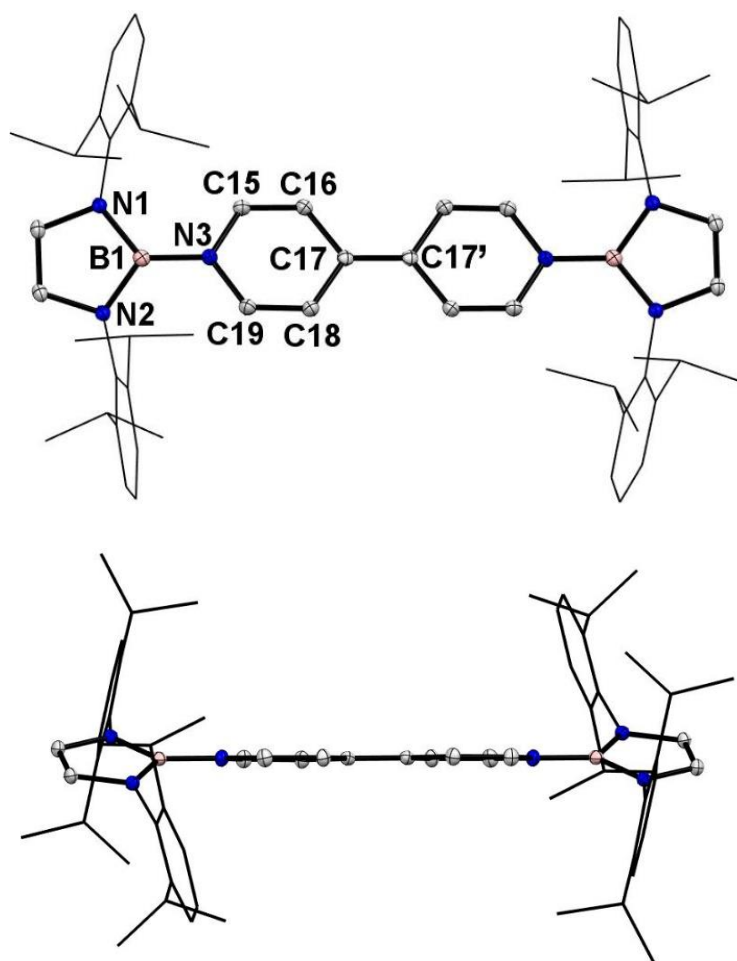

**Fig. S18** Solid-state structures of  $1^+$  (top) with side view (bottom). Hydrogen atoms are omitted and Dipp groups are simplified as wireframes for clarity. Thermal ellipsoids are set at the 30% probability level. Selected bond lengths (Å) and angles (°): B1–N1 1.424(5), B1–N2 1.423(5), B1–N3 1.476(5), N3–C15 1.380(5), N3–C19 1.377(4), C15–C16 1.350(5), C18–C19 1.359(5), C16–C17 1.426(5), C17–C18 1.427(5), C17–C17' 1.424(7), N1–B1–N2 107.0(3), N1–B1–N3 126.5(3), N2–B1–N3 126.5(3).

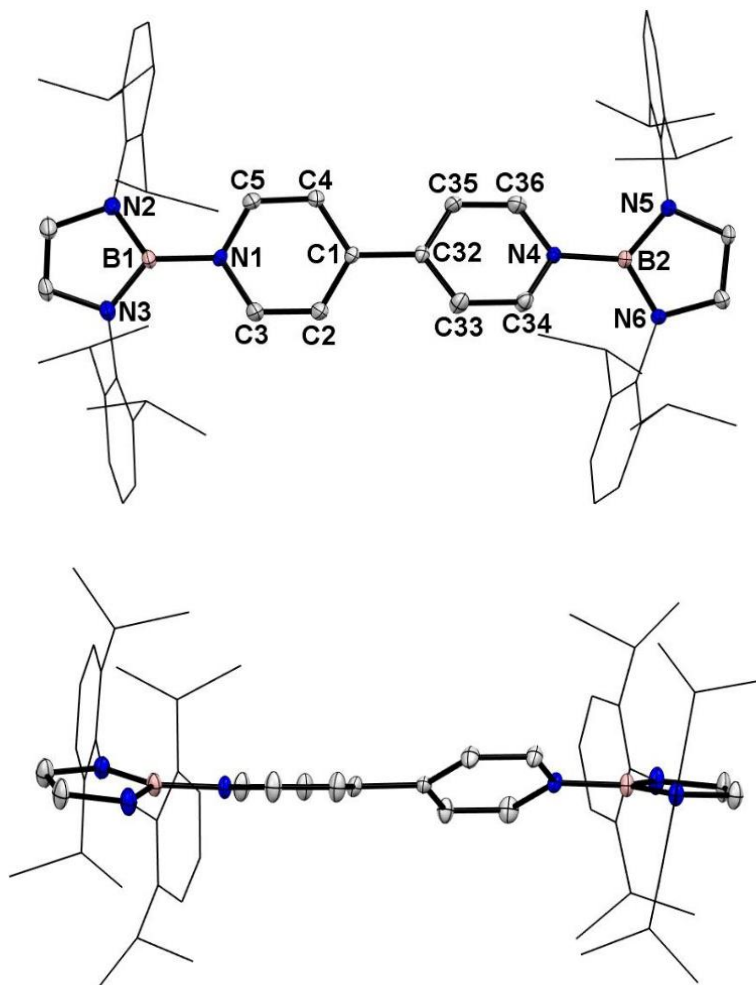

**Fig. S19** Solid-state structures of  $1^{2+}$  (top) with side view (bottom). Hydrogen atoms are omitted and Dipp groups are simplified as wireframes for clarity. Thermal ellipsoids are set at the 30% probability level. Selected bond lengths (Å) and angles ( $^{\circ}$ ): B1–N1 1.514(9), B1–N2 1.406(10), B1–N3 1.398(9), B2–N3 1.398(9), B2–N4 1.508(8), B2–N6 1.411(9), N1–C3 1.349(9), N1–C5 1.358(9), N4–C34 1.343(9), N4–C36 1.402(9), C1–C2 1.360(9), C1–C4 1.403(9), C2–C3 1.363(10), C4–C5 1.357(10), C32–C33 1.386(9), C32–C35 1.408(9), C33–C34 1.371(10), C35–C36 1.338(10), C1–C32 1.479(8), N1–B1–N2 125.1(6), N1–B1–N3 127.1(7), N2–B1–N3 107.7(6), N4–B2–N5 127.2(6), N4–B2–N6 124.7(6), N5–B2–N6 108.1(5).

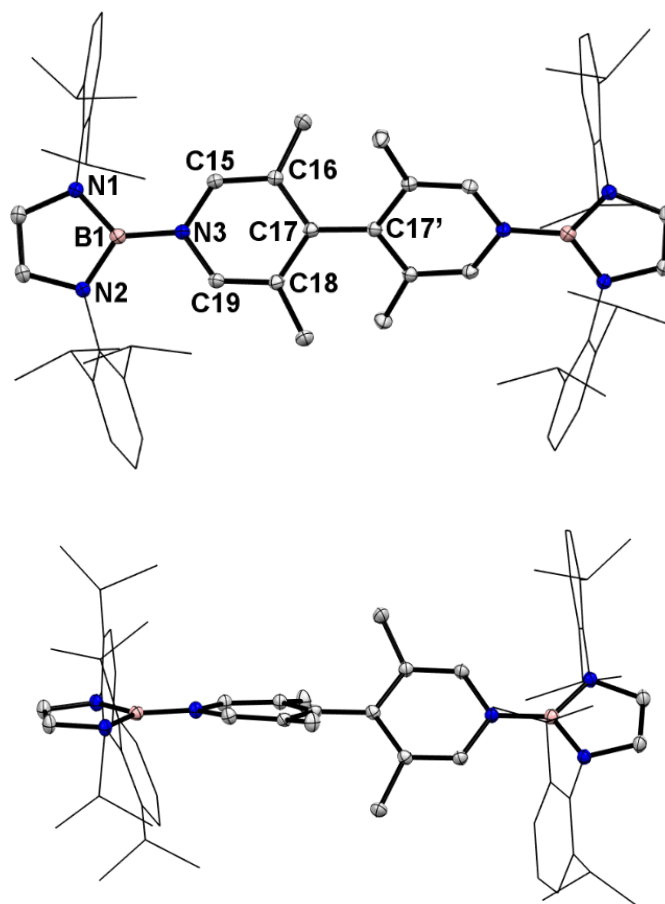

**Fig. S20** Solid-state structures of **2** (top) with side view (bottom). Hydrogen atoms are omitted and Dipp groups are simplified as wireframes for clarity. Thermal ellipsoids are set at the 30% probability level. Selected bond lengths (Å) and angles (°): B1–N1 1.434(2), B1–N2 1.439(2), B1–N3 1.451(2), N3–C15 1.3989(19), N3–C19 1.4008(19), C15–C16 1.353(2), C18–C19 1.347(2), C16–C17 1.460(2), C17–C18 1.455(2), C17–C17' 1.417(3), N1–B1–N2 105.25(13), N1–B1–N3 128.58(14), N2–B1–N3 126.17(14).

3.

### 3. VT-EPR spectra of **2** in toluene

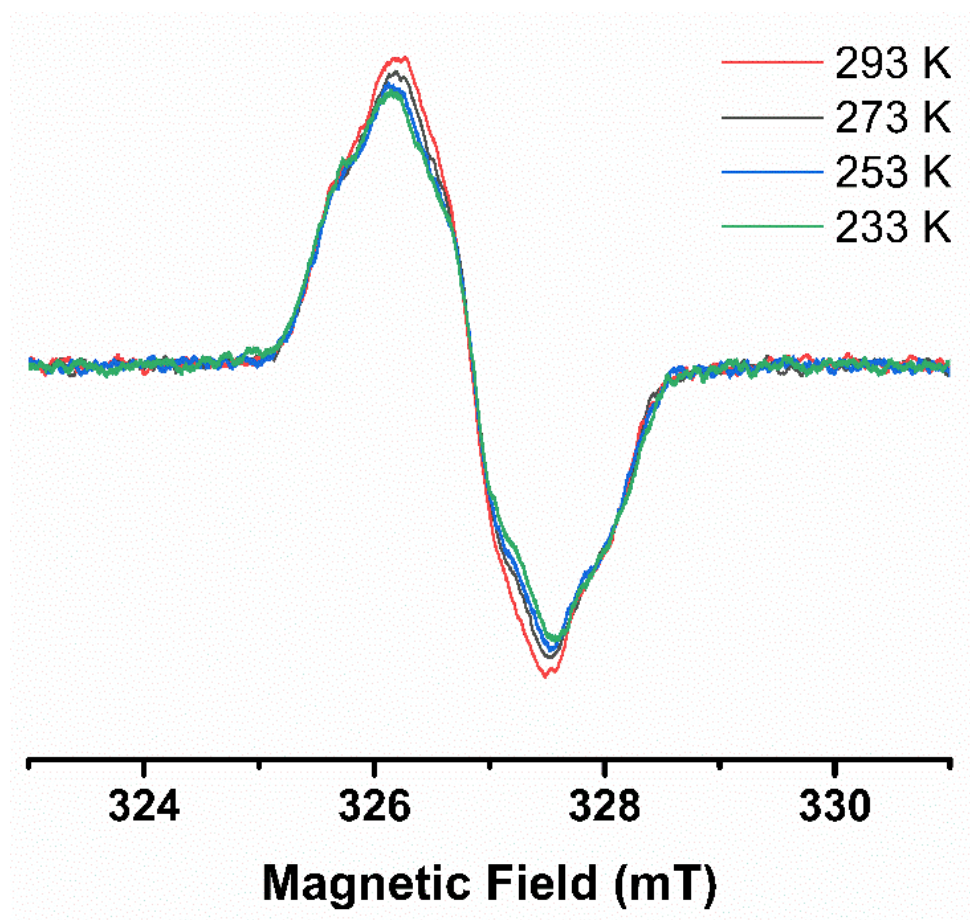

**Fig. S21** VT-EPR spectra of **2** in toluene.

### 4. Theoretical calculations

The calculations were performed with the Gaussian 16 program.<sup>S5</sup> For geometry optimizations and frequency calculations on the simplified model **1'** and **2'**, in which the Dipp groups were replaced with the phenyls, three electronic states (closed-shell singlet (CS), open-shell singlet (OS), and triplet (T) state) with the (U)B3LYP, (U)BH&HLYP, and (U)PBE0 functional and Def2SVP and 6-311G(d) basis-sets were considered. The diradical character for **2'** was calculated at the UBH&HLYP/def2-SVP level. Geometry optimizations and frequency calculations for **1<sup>+</sup>** and **1<sup>2+</sup>** were performed at the (U)B3LYP/6-311G(d) level. TD-DFT, NICS, and natural bond orbital (NBO) calculations were conducted under the UB3LYP/6-311G(d) level of theory. The calculated Kohn-Sham orbitals related to the

observed transitions are shown in Tables S8-S11. To gain further insight into the electronic structures, Multiwfn<sup>S6</sup> and VMD<sup>S7</sup> were also used.

**Table S2.** Electronic energies ( $E$  in Hartrees) and relative electronic energies ( $\Delta E_{\text{CS-T}}$  in kcal/mol) of  $\mathbf{1}'$  in closed-shell singlet (CS) and triplet (T) states.

| Methods           | $E_{\text{CS}}$ | $E_{\text{T}}$ | $\Delta E_{\text{CS-T}}$ |
|-------------------|-----------------|----------------|--------------------------|
| B3LYP/6-311G(d)   | -1845.438394    | -1845.392669   | -28.69                   |
| BH&HLYP/6-311G(d) | -1844.272981    | -1844.233030   | -25.07                   |
| BH&HLYP/def2-SVP  | -1842.596472    | -1842.556486   | -25.09                   |
| PBE0/def2-SVP     | -1841.596450    | -1841.551817   | -28.01                   |

**Table S3.** Experimental and calculated bond lengths (avg., Å) and angles of  $\mathbf{1}$ ,  $\mathbf{1}^+$ , and  $\mathbf{1}^{2+}$  at the (U)B3LYP/6-311G(d) level.

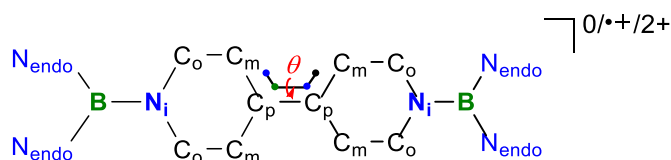

|                                | $\mathbf{1}_{\text{exp}}$ | $\mathbf{1}'\text{-CS}$ | $\mathbf{1}'\text{-T}$ | $\mathbf{1}^+_{\text{exp}}$ | $\mathbf{1}^+_{\text{cal}}$ | $\mathbf{1}^{2+}_{\text{exp}}$ | $\mathbf{1}^{2+}_{\text{cal}}$ |
|--------------------------------|---------------------------|-------------------------|------------------------|-----------------------------|-----------------------------|--------------------------------|--------------------------------|
| B-N <sub>endo</sub>            | 1.4340(18)                | 1.4481                  | 1.4500                 | 1.424(5)                    | 1.4331                      | 1.407(9)                       | 1.4295                         |
| B-N <sub>i</sub>               | 1.4033(18)                | 1.4543                  | 1.4542                 | 1.476(5)                    | 1.4890                      | 1.511(8)                       | 1.5045                         |
| N <sub>i</sub> -C <sub>o</sub> | 1.4016(18)                | 1.4027                  | 1.4100                 | 1.378(4)                    | 1.3791                      | 1.363(9)                       | 1.3647                         |
| C <sub>o</sub> -C <sub>m</sub> | 1.3420(19)                | 1.3476                  | 1.3634                 | 1.354(5)                    | 1.3619                      | 1.357(10)                      | 1.3765                         |
| C <sub>m</sub> -C <sub>p</sub> | 1.4558(18)                | 1.4561                  | 1.4221                 | 1.426(5)                    | 1.4294                      | 1.389(9)                       | 1.4050                         |
| C <sub>p</sub> -C <sub>p</sub> | 1.374(2)                  | 1.3829                  | 1.4808                 | 1.424(7)                    | 1.4279                      | 1.479(8)                       | 1.4729                         |
| BLA                            | 0.0867(18)                | 0.0818                  | 0.0527                 | 0.048(5)                    | 0.0423                      | 0.019(9)                       | 0.0084                         |
| $\theta$                       | 0                         | 0                       | 67.5                   | 0                           | 0                           | 27.5                           | 30.4                           |

**Table S4.** NICS values for **1'** and **1<sup>+</sup>** and **1<sup>2+</sup>** calculated at the (U)B3LYP/6-311G(d) level.

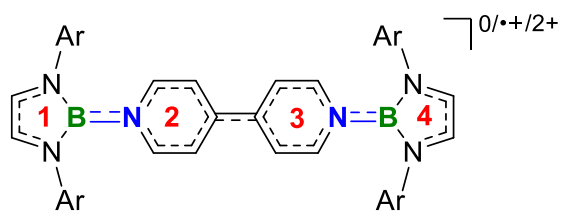

|                               | <b>1'</b> | <b>1<sup>+</sup></b> | <b>1<sup>2+</sup></b> |
|-------------------------------|-----------|----------------------|-----------------------|
| Ring 1 NICS (0)               | -8.1933   | -8.8637              | -12.9781              |
| Ring 1 NICS (1)               | -4.2853   | -5.1200              | -5.3309               |
| Ring 1 NICS (1) <sub>zz</sub> | -15.0098  | -17.2694             | -17.3682              |
| Ring 2 NICS (0)               | 1.7625    | -4.7459              | -5.5317               |
| Ring 2 NICS (1)               | 1.3514    | -3.5568              | -8.0522               |
| Ring 2 NICS (1) <sub>zz</sub> | 9.9999    | -4.2387              | -17.8129              |
| Ring 3 NICS (0)               | 1.7625    | -4.7459              | -5.3786               |
| Ring 3 NICS (1)               | 1.3514    | -3.5568              | -7.9972               |
| Ring 3 NICS (1) <sub>zz</sub> | 9.9999    | -4.2387              | -17.9567              |
| Ring 4 NICS (0)               | -8.1933   | -8.8637              | -11.4110              |
| Ring 4 NICS (1)               | -4.2853   | -5.1200              | -5.3679               |
| Ring 4 NICS (1) <sub>zz</sub> | -15.0098  | -17.2694             | -17.3583              |

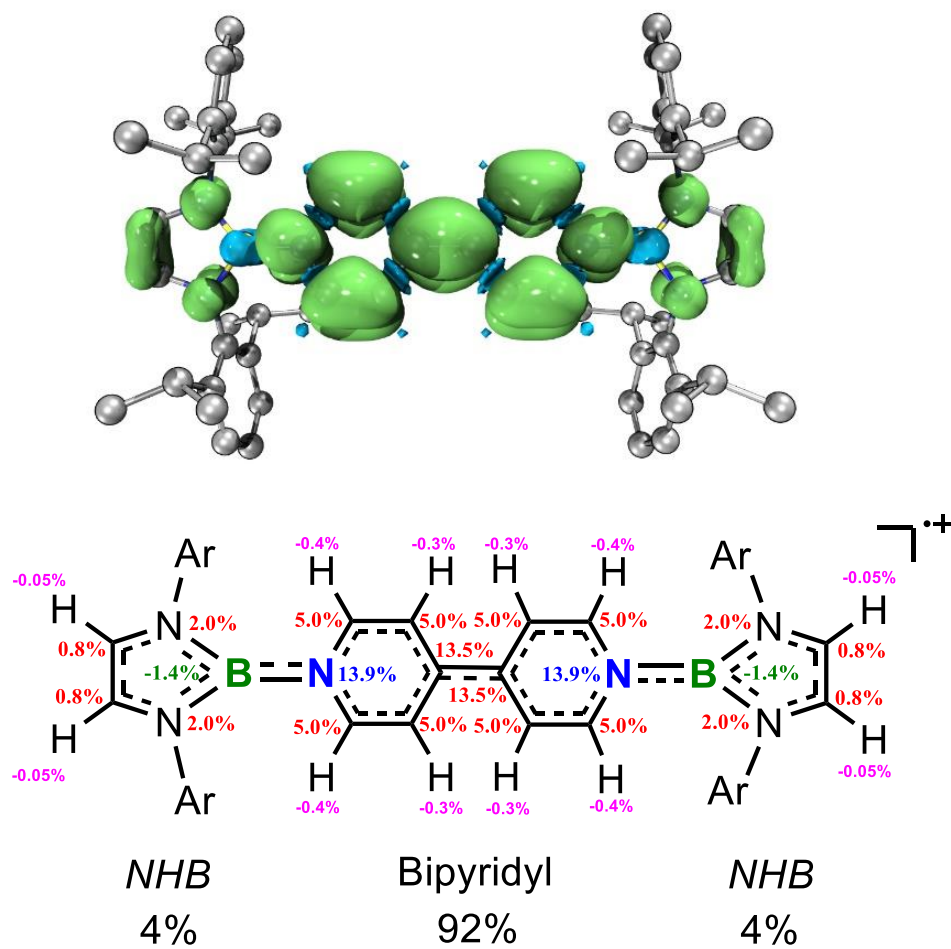

**Fig S22.** The calculated spin density map of  $1^+$ .

**Table S5.** Selected data of NPA charges of  $1^{2+}$

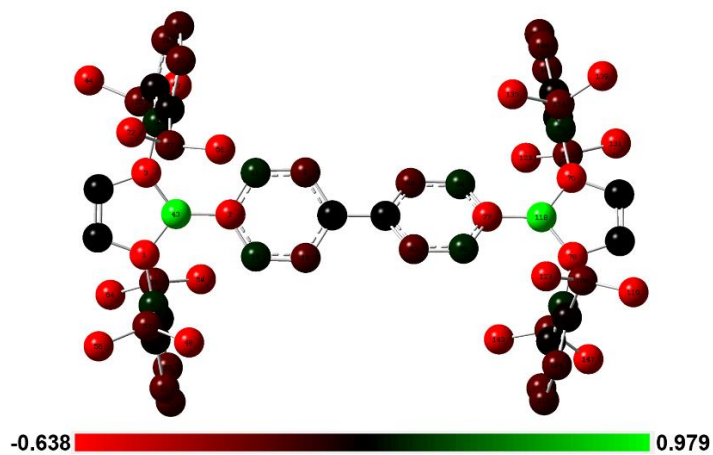

Natural Population

| Natural |    |          |         |         |         |         |
|---------|----|----------|---------|---------|---------|---------|
| Atom    | No | Charge   | Core    | Valence | Rydberg | Total   |
|         |    |          |         |         |         |         |
| N       | 1  | -0.63788 | 1.99913 | 5.62807 | 0.01069 | 7.63788 |
| N       | 2  | -0.51390 | 1.99916 | 5.50352 | 0.01122 | 7.51390 |
| N       | 3  | -0.63788 | 1.99913 | 5.62807 | 0.01069 | 7.63788 |
| C       | 5  | -0.00033 | 1.99894 | 3.98451 | 0.01688 | 6.00033 |
| C       | 6  | -0.00266 | 1.99909 | 3.98344 | 0.02013 | 6.00266 |
| C       | 8  | -0.19320 | 1.99902 | 4.17954 | 0.01464 | 6.19320 |
| C       | 11 | 0.12245  | 1.99909 | 3.85802 | 0.02043 | 5.87755 |
| C       | 13 | -0.00266 | 1.99909 | 3.98344 | 0.02013 | 6.00266 |
| C       | 15 | -0.19320 | 1.99902 | 4.17954 | 0.01464 | 6.19320 |
| C       | 19 | 0.12245  | 1.99909 | 3.85802 | 0.02043 | 5.87755 |
| B       | 43 | 0.97831  | 1.99854 | 1.99962 | 0.02353 | 4.02169 |
| N       | 76 | -0.63828 | 1.99912 | 5.62847 | 0.01068 | 7.63828 |
| N       | 77 | -0.51405 | 1.99916 | 5.50368 | 0.01121 | 7.51405 |
| N       | 78 | -0.63828 | 1.99912 | 5.62847 | 0.01068 | 7.63828 |
| C       | 80 | -0.00008 | 1.99894 | 3.98426 | 0.01688 | 6.00008 |
| C       | 81 | -0.00334 | 1.99909 | 3.98413 | 0.02012 | 6.00334 |
| C       | 83 | -0.19345 | 1.99902 | 4.17984 | 0.01460 | 6.19345 |
| C       | 86 | 0.12314  | 1.99909 | 3.85749 | 0.02028 | 5.87686 |
| C       | 88 | -0.00334 | 1.99909 | 3.98413 | 0.02012 | 6.00334 |
| C       | 90 | -0.19345 | 1.99902 | 4.17984 | 0.01460 | 6.19345 |
| C       | 94 | 0.12314  | 1.99909 | 3.85749 | 0.02028 | 5.87686 |
|         |    |          |         |         |         |         |



**Table S6.** Electronic energies ( $E$  in Hartrees) and relative electronic energies ( $\Delta E_{\text{CS-T}}$  in kcal/mol) of **2'** in closed-shell singlet (CS) and open-shell singlet (OS) and triplet (T) states at BH&HLYP/def2-SVP.

| State | $E$          | $\langle S^2 \rangle$ | $\Delta E_{\text{X-OS}}$ |
|-------|--------------|-----------------------|--------------------------|
| CS    | -1999.483034 | 0                     | 6.82                     |
| OS    | -1999.492838 | 1.0248                | 0                        |
| T     | -1999.491710 | 2.1131                | 1.37                     |

**Table S7.** Experimental and calculated bond lengths (avg., Å) of **2'** at the (U)BH&HLYP/def2-SVP level.

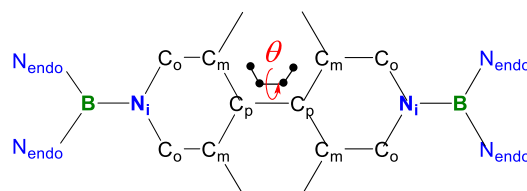

|                                | <b>2</b> -exp | <b>2'</b> -CS | <b>2'</b> -OS | <b>2'</b> -T |
|--------------------------------|---------------|---------------|---------------|--------------|
| B–N <sub>endo</sub>            | 1.436(2)      | 1.4392        | 1.4402        | 1.4404       |
| B–N <sub>i</sub>               | 1.451(2)      | 1.4481        | 1.4473        | 1.4476       |
| N <sub>i</sub> –C <sub>o</sub> | 1.400(2)      | 1.3835        | 1.3942        | 1.3955       |
| C <sub>o</sub> –C <sub>m</sub> | 1.350(2)      | 1.3460        | 1.3590        | 1.3609       |
| C <sub>m</sub> –C <sub>p</sub> | 1.458(2)      | 1.4741        | 1.4353        | 1.4293       |
| C <sub>p</sub> –C <sub>p</sub> | 1.417(3)      | 1.3981        | 1.4712        | 1.4836       |
| BLA                            | 0.079(2)      | 0.0828        | 0.0558        | 0.0515       |
| $\theta$                       | 53.2          | 44.6          | 72.7          | 89.53        |

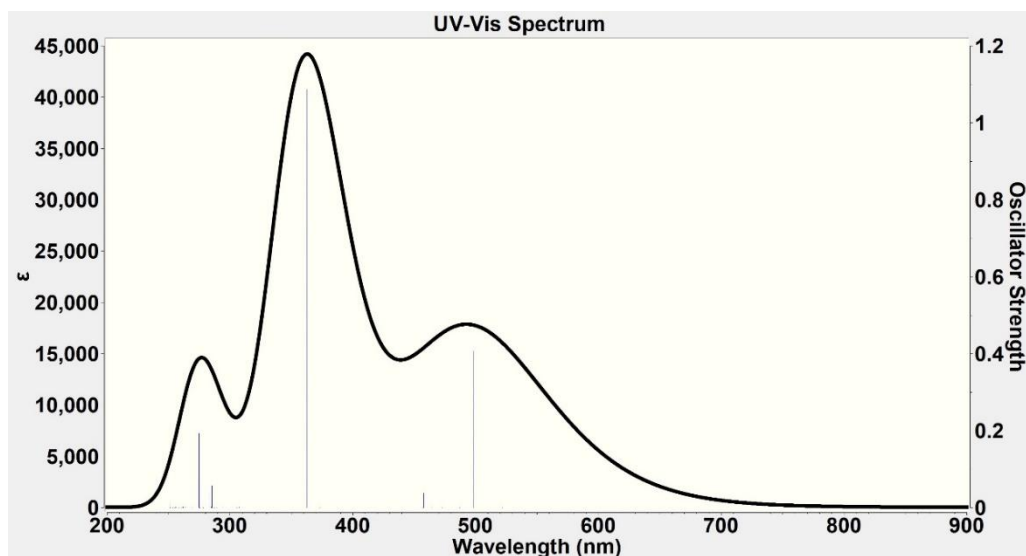

**Fig S23.** Calculated UV-vis spectrum of **1'** at the TD-DFT//B3LYP/6-311G(d) level.

**Table S8.** Calculated absorption properties of **1'** including wavelength (nm), oscillator strength (f) and the related transition nature.

| Energy/<br>eV | Wavelength/<br>nm | Oscillator strength/ f | Transition nature     |
|---------------|-------------------|------------------------|-----------------------|
| 2.48          | 498.52            | 0.4061                 | HOMO→LUMO (0.67138)   |
| 70            |                   |                        | HOMO→LUMO+8 (0.20438) |
| 3.41          | 362.76            | 1.0683                 | HOMO→LUMO (-0.19715)  |
| 78            |                   |                        | HOMO→LUMO+8 (0.66115) |

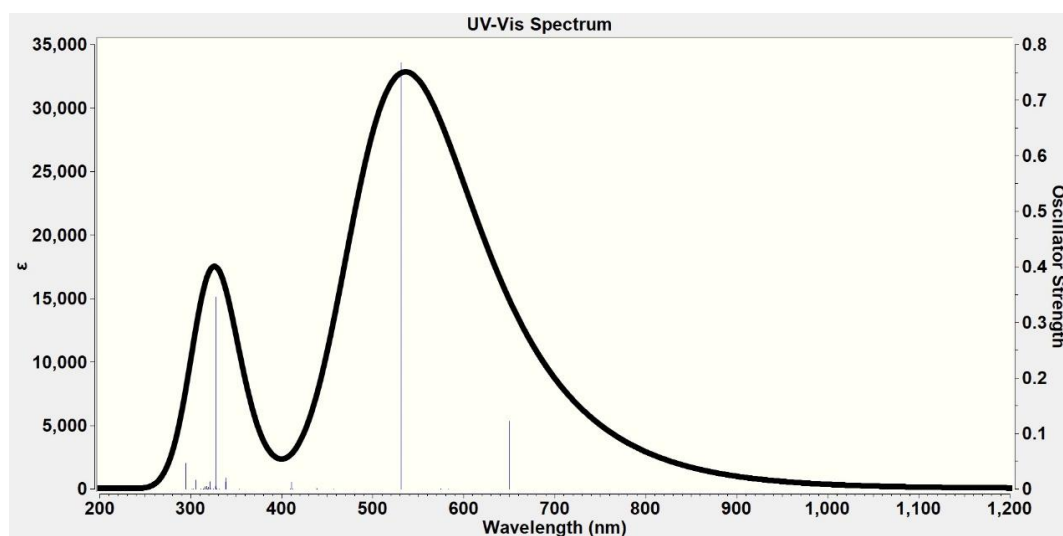

**Figure S24.** Calculated UV-vis spectrum of **1<sup>+</sup>** at the TD-DFT//UB3LYP/6-311G(d) level.

**Table S9.** Calculated absorption properties of  $1^+$  including wavelength (nm), oscillator strength (f) and the related transition nature.

| Energy/<br>eV | Wavelength<br>/nm | Oscillator<br>strength/ f | Transition nature                                                                                                             |
|---------------|-------------------|---------------------------|-------------------------------------------------------------------------------------------------------------------------------|
| 1.9073        | 650.06            | 0.1224                    | SOMO-1 ( $\beta$ ) $\rightarrow$ SOMO ( $\beta$ ) (0.95814)<br>SOMO ( $\alpha$ ) $\rightarrow$ LUMO ( $\alpha$ ) (0.25532)    |
| 2.3344        | 531.11            | 0.7675                    | SOMO ( $\alpha$ ) $\rightarrow$ LUMO ( $\alpha$ ) (0.93472)<br>SOMO-1 ( $\beta$ ) $\rightarrow$ SOMO ( $\beta$ ) (-0.25217)   |
| 3.7800        | 328.00            | 0.3460                    | SOMO-13 ( $\beta$ ) $\rightarrow$ SOMO ( $\beta$ ) (0.86836)<br>SOMO-2 ( $\beta$ ) $\rightarrow$ LUMO+1 ( $\beta$ ) (0.25715) |

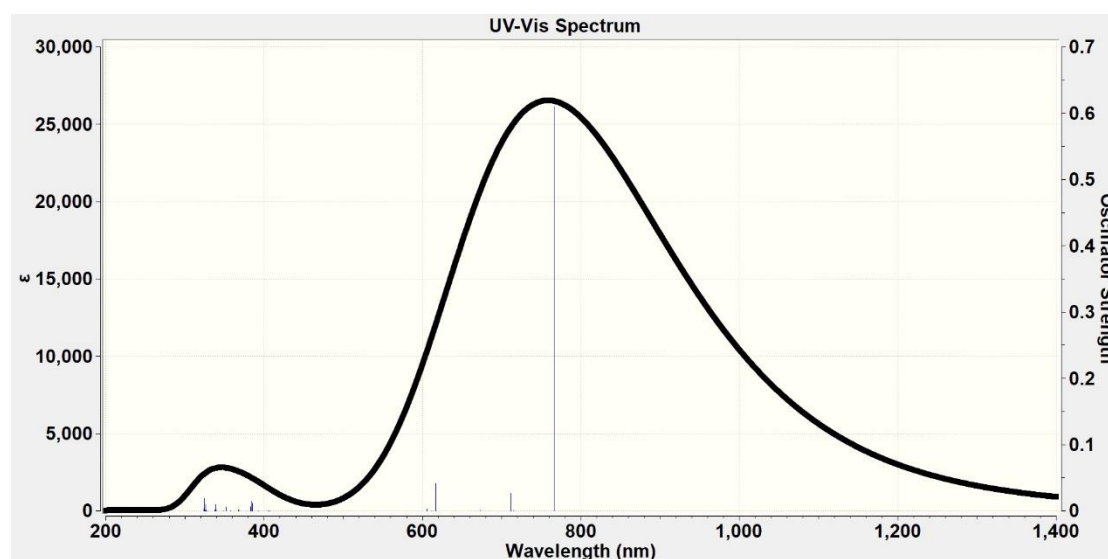

**Figure S25.** Calculated UV-vis spectrum of  $1^{2+}$  at the TD-DFT//UB3LYP/6-311G(d) level.

**Table S10.** Calculated absorption properties of  $1^{2+}$  including wavelength (nm), oscillator strength (f) and the related transition nature

| Energy/<br>eV | Wavelength<br>/nm | Oscillator<br>strength/ f | Transition nature                   |
|---------------|-------------------|---------------------------|-------------------------------------|
| 1.6180        | 766.29            | 0.6100                    | HOMO $\rightarrow$ LUMO (0.69804)   |
| 2.0107        | 616.62            | 0.0412                    | HOMO-6 $\rightarrow$ LUMO (0.69906) |

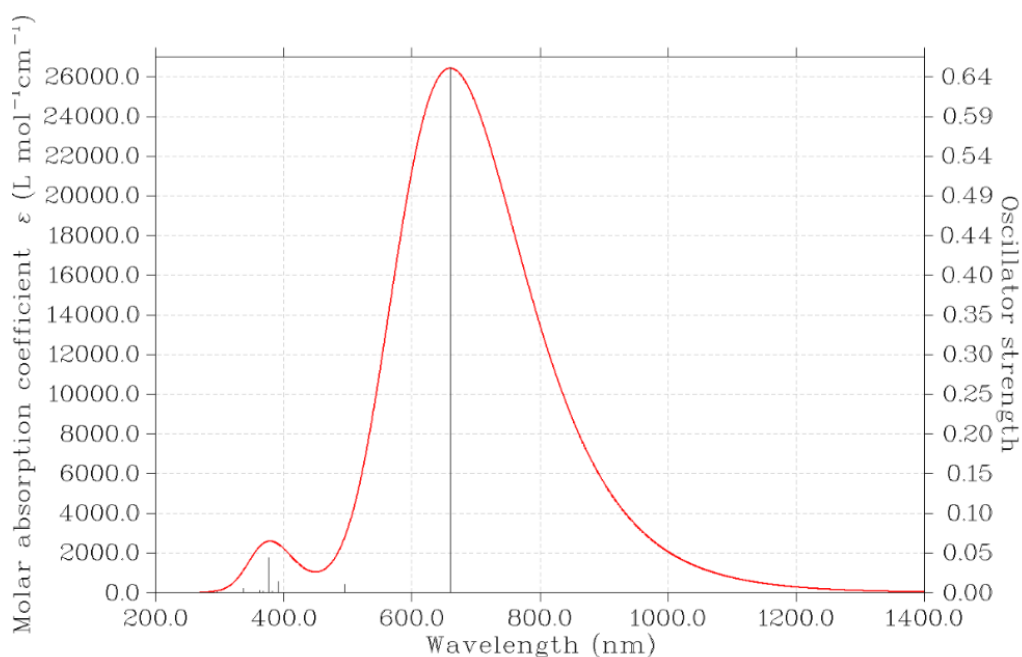

**Figure S26.** Calculated UV-vis spectrum of **2** at the TD-DFT//UBH&HLYP/6-311G(d) level.

**Table S11.** Calculated absorption properties of **2'** including wavelength (nm), oscillator strength (f) and the related transition nature.

| Energy/<br>eV | Wavelength<br>/nm | Oscillator<br>strength/ f | Transition nature                                             |
|---------------|-------------------|---------------------------|---------------------------------------------------------------|
| 1.8788        | 659.90            | 0.6528                    | HOMO ( $\alpha$ ) $\rightarrow$ LUMO ( $\alpha$ ) (0.70967)   |
|               |                   |                           | HOMO ( $\beta$ ) $\rightarrow$ LUMO ( $\beta$ ) (0.70967)     |
|               |                   |                           | LUMO ( $\alpha$ ) $\rightarrow$ HOMO ( $\alpha$ ) (-0.13725)  |
|               |                   |                           | LUMO ( $\beta$ ) $\rightarrow$ HOMO ( $\beta$ ) (-0.13725)    |
| 3.2874        | 377.15            | 0.0431                    | HOMO ( $\beta$ ) $\rightarrow$ LUMO+8 ( $\beta$ ) (0.65733)   |
|               |                   |                           | HOMO ( $\alpha$ ) $\rightarrow$ LUMO+2 ( $\alpha$ ) (0.22067) |
|               |                   |                           | HOMO ( $\beta$ ) $\rightarrow$ LUMO+2 ( $\beta$ ) (0.22067)   |

## 5. Coordinates of the studied molecules

1'-CS calculated at the B3LYP/6-311G(d) level.

|   |             |             |             |
|---|-------------|-------------|-------------|
| B | -5.05221300 | 0.00000000  | -0.00000100 |
| C | -7.25581700 | -0.67245300 | -0.02022600 |
| H | -8.09585100 | -1.34812500 | -0.01268300 |
| C | -7.25581700 | 0.67245300  | 0.02022400  |
| H | -8.09585000 | 1.34812500  | 0.01268000  |
| C | -5.64618900 | -2.54030000 | 0.04159100  |
| C | -6.34800300 | -3.43894200 | -0.77055900 |
| C | -6.08440800 | -4.80407600 | -0.69948200 |
| H | -6.63671200 | -5.48840900 | -1.33571400 |
| C | -5.10881700 | -5.28893700 | 0.16891000  |
| H | -4.90026200 | -6.35245300 | 0.21914600  |
| C | -4.40233500 | -4.39491300 | 0.97124500  |
| H | -3.64140500 | -4.75966700 | 1.65360300  |
| C | -4.67130900 | -3.03058200 | 0.91734500  |
| C | -5.64618800 | 2.54030000  | -0.04159100 |
| C | -6.34800200 | 3.43894100  | 0.77056000  |
| C | -6.08440500 | 4.80407500  | 0.69948400  |
| H | -6.63671000 | 5.48840800  | 1.33571600  |
| C | -5.10881400 | 5.28893500  | -0.16890700 |
| H | -4.90025800 | 6.35245100  | -0.21914200 |
| C | -4.40233100 | 4.39491200  | -0.97124200 |
| H | -3.64140000 | 4.75966500  | -1.65359900 |
| C | -4.67130700 | 3.03058100  | -0.91734300 |
| C | -2.85004400 | 0.89991100  | 0.77360600  |
| H | -3.43106200 | 1.58180600  | 1.37965800  |
| C | -1.50264900 | 0.91531600  | 0.79011800  |
| H | -1.03335700 | 1.64709700  | 1.43564900  |
| C | -0.69146800 | 0.00000000  | -0.00000100 |
| C | -1.50264800 | -0.91531700 | -0.79012000 |
| H | -1.03335700 | -1.64709700 | -1.43565100 |
| C | -2.85004400 | -0.89991100 | -0.77360800 |
| H | -3.43106200 | -1.58180600 | -1.37966100 |
| N | -5.93157600 | -1.15039900 | -0.01649400 |
| N | -5.93157600 | 1.15039800  | 0.01649300  |
| N | -3.59792300 | 0.00000000  | -0.00000100 |
| B | 5.05221200  | 0.00000000  | -0.00000100 |
| C | 7.25581600  | 0.67245500  | 0.02022200  |
| H | 8.09584900  | 1.34812800  | 0.01267800  |
| C | 7.25581700  | -0.67245100 | -0.02022600 |
| H | 8.09585100  | -1.34812300 | -0.01268300 |

|   |             |             |             |
|---|-------------|-------------|-------------|
| C | 5.64618600  | 2.54030100  | -0.04159400 |
| C | 6.34800100  | 3.43894300  | 0.77055500  |
| C | 6.08440400  | 4.80407800  | 0.69947700  |
| H | 6.63670800  | 5.48841100  | 1.33570800  |
| C | 5.10881200  | 5.28893600  | -0.16891500 |
| H | 4.90025600  | 6.35245200  | -0.21915100 |
| C | 4.40233000  | 4.39491200  | -0.97124800 |
| H | 3.64139900  | 4.75966400  | -1.65360600 |
| C | 4.67130500  | 3.03058100  | -0.91734700 |
| C | 5.64619000  | -2.54029900 | 0.04159400  |
| C | 6.34800500  | -3.43894100 | -0.77055500 |
| C | 6.08441100  | -4.80407600 | -0.69947600 |
| H | 6.63671500  | -5.48840900 | -1.33570700 |
| C | 5.10882200  | -5.28893600 | 0.16891800  |
| H | 4.90026700  | -6.35245200 | 0.21915500  |
| C | 4.40233900  | -4.39491200 | 0.97125200  |
| H | 3.64141000  | -4.75966500 | 1.65361100  |
| C | 4.67131100  | -3.03058100 | 0.91734900  |
| C | 2.85004400  | -0.89991100 | -0.77360700 |
| H | 3.43106100  | -1.58180600 | -1.37966100 |
| C | 1.50264800  | -0.91531700 | -0.79012000 |
| H | 1.03335600  | -1.64709700 | -1.43565100 |
| C | 0.69146700  | 0.00000000  | 0.00000000  |
| C | 1.50264800  | 0.91531600  | 0.79011900  |
| H | 1.03335600  | 1.64709600  | 1.43565000  |
| C | 2.85004400  | 0.89991100  | 0.77360700  |
| H | 3.43106100  | 1.58180500  | 1.37966000  |
| N | 5.93157500  | 1.15039900  | 0.01649200  |
| N | 5.93157600  | -1.15039700 | -0.01649300 |
| N | 3.59792200  | 0.00000000  | 0.00000000  |
| H | 7.08639100  | -3.06262700 | -1.47064300 |
| H | 4.13162500  | -2.34142400 | 1.55574300  |
| H | 7.08638900  | 3.06263000  | 1.47064100  |
| H | 4.13161800  | 2.34142400  | -1.55574000 |
| H | -4.13162000 | 2.34142500  | -1.55573700 |
| H | -7.08639000 | 3.06262600  | 1.47064500  |
| H | -4.13162200 | -2.34142600 | 1.55573800  |
| H | -7.08639000 | -3.06262700 | -1.47064600 |

**1'-T** calculated at the UB3LYP/6-311G(d) level.

|   |             |             |             |
|---|-------------|-------------|-------------|
| B | -5.06629300 | 0.00000100  | 0.00000000  |
| C | -7.27041600 | -0.54738200 | -0.39089900 |
| H | -8.11097400 | -1.11379000 | -0.75814700 |

|   |             |             |             |
|---|-------------|-------------|-------------|
| C | -7.27041500 | 0.54738500  | 0.39090200  |
| H | -8.11097300 | 1.11379300  | 0.75815200  |
| C | -5.66748100 | -2.14098400 | -1.37094800 |
| C | -6.37836000 | -2.44694200 | -2.53779900 |
| C | -6.12054600 | -3.62700900 | -3.22961200 |
| H | -6.67954500 | -3.84930400 | -4.13308200 |
| C | -5.14205400 | -4.50985800 | -2.77703400 |
| H | -4.93825800 | -5.42671500 | -3.32009800 |
| C | -4.42681300 | -4.20294300 | -1.62119900 |
| H | -3.66415300 | -4.88340200 | -1.25629300 |
| C | -4.68898000 | -3.03208500 | -0.91590700 |
| C | -5.66747900 | 2.14098600  | 1.37094900  |
| C | -6.37835600 | 2.44694500  | 2.53780100  |
| C | -6.12054000 | 3.62701100  | 3.22961400  |
| H | -6.67953800 | 3.84930600  | 4.13308500  |
| C | -5.14205000 | 4.50986100  | 2.77703400  |
| H | -4.93825300 | 5.42671700  | 3.32009800  |
| C | -4.42681100 | 4.20294600  | 1.62119700  |
| H | -3.66415100 | 4.88340500  | 1.25629100  |
| C | -4.68897900 | 3.03208800  | 0.91590600  |
| C | -2.86745100 | 0.35649000  | 1.14301700  |
| H | -3.44679400 | 0.60574800  | 2.02004500  |
| C | -1.50404900 | 0.35419500  | 1.14643000  |
| H | -0.99844200 | 0.62230700  | 2.06860500  |
| C | -0.74070000 | 0.00000100  | -0.00000300 |
| C | -1.50405100 | -0.35419300 | -1.14643600 |
| H | -0.99844500 | -0.62230500 | -2.06861100 |
| C | -2.86745200 | -0.35648800 | -1.14302000 |
| H | -3.44679700 | -0.60574500 | -2.02004800 |
| N | -5.94685900 | -0.94719800 | -0.65571700 |
| N | -5.94685800 | 0.94720100  | 0.65571800  |
| N | -3.61213400 | 0.00000100  | -0.00000100 |
| B | 5.06575500  | -0.00000100 | 0.00000100  |
| C | 7.26975700  | 0.57455500  | -0.34975900 |
| H | 8.11024000  | 1.13487400  | -0.72640800 |
| C | 7.26975500  | -0.57455900 | 0.34976900  |
| H | 8.11023600  | -1.13487800 | 0.72642100  |
| C | 5.66718400  | 2.10162600  | -1.43084600 |
| C | 6.37658900  | 3.29549500  | -1.25238700 |
| C | 6.11958400  | 4.39486700  | -2.06662800 |
| H | 6.67741400  | 5.31357700  | -1.91511100 |
| C | 5.14330400  | 4.32437200  | -3.05839600 |
| H | 4.94000900  | 5.18367800  | -3.68874700 |
| C | 4.42952000  | 3.14021000  | -3.23166200 |

|   |             |             |             |
|---|-------------|-------------|-------------|
| H | 3.66823400  | 3.07121800  | -4.00202300 |
| C | 4.69113700  | 2.03202200  | -2.43134200 |
| C | 5.66717700  | -2.10162900 | 1.43085000  |
| C | 6.37658300  | -3.29549800 | 1.25239400  |
| C | 6.11957400  | -4.39487000 | 2.06663300  |
| H | 6.67740500  | -5.31358000 | 1.91511800  |
| C | 5.14328900  | -4.32437600 | 3.05839600  |
| H | 4.93999200  | -5.18368200 | 3.68874600  |
| C | 4.42950400  | -3.14021400 | 3.23165900  |
| H | 3.66821500  | -3.07122200 | 4.00201600  |
| C | 4.69112500  | -2.03202600 | 2.43134100  |
| C | 2.86688900  | -1.19201800 | -0.11353100 |
| H | 3.44618200  | -2.09701900 | -0.22438400 |
| C | 1.50359000  | -1.19472200 | -0.11170400 |
| H | 0.99783400  | -2.15048400 | -0.20430100 |
| C | 0.74013000  | 0.00000100  | -0.00000400 |
| C | 1.50359100  | 1.19472300  | 0.11169600  |
| H | 0.99783600  | 2.15048500  | 0.20429200  |
| C | 2.86689000  | 1.19201800  | 0.11352500  |
| H | 3.44618300  | 2.09701800  | 0.22437800  |
| N | 5.94618900  | 0.97513300  | -0.61327700 |
| N | 5.94618600  | -0.97513500 | 0.61328200  |
| N | 3.61166400  | -0.00000100 | -0.00000200 |
| H | 7.11528400  | -3.36530700 | 0.46094300  |
| H | 4.14665200  | -1.10773000 | 2.58254300  |
| H | 7.11528600  | 3.36530400  | -0.46093300 |
| H | 4.14666400  | 1.10772600  | -2.58254700 |
| H | -4.14366700 | 2.80743200  | 0.00717400  |
| H | -7.11887700 | 1.74776400  | 2.91157900  |
| H | -4.14366600 | -2.80743000 | -0.00717600 |
| H | -7.11888200 | -1.74776200 | -2.91157500 |

**1<sup>+</sup>** calculated at the UB3LYP/6-311G(d) level.

|   |             |             |             |
|---|-------------|-------------|-------------|
| N | -5.92536900 | 1.14734800  | 0.03239700  |
| N | -3.57824300 | -0.00000900 | 0.00007000  |
| N | -5.92521600 | -1.14760300 | -0.03196600 |
| C | -0.71397800 | -0.00000100 | 0.00000900  |
| C | -7.24689000 | 0.67444500  | 0.02070900  |
| H | -8.08143400 | 1.35632600  | 0.05172800  |
| C | -2.85445200 | -1.06905000 | 0.48509400  |
| H | -3.43218500 | -1.90043800 | 0.85894800  |
| C | -7.24679700 | -0.67488800 | -0.02006900 |
| H | -8.08125800 | -1.35688300 | -0.05082800 |



|   |             |             |             |
|---|-------------|-------------|-------------|
| C | -1.49276300 | 1.09210900  | -0.49410200 |
| H | -1.02442400 | 1.97935000  | -0.89789900 |
| C | -5.64948800 | 2.55906400  | 0.12892300  |
| C | -2.85448000 | 1.06902300  | -0.48500500 |
| H | -3.43222300 | 1.90040200  | -0.85887200 |
| C | -5.34691900 | 3.11654000  | 1.38826300  |
| C | -1.49273600 | -1.09212300 | 0.49414300  |
| H | -1.02437000 | -1.97935400 | 0.89793000  |
| C | -5.64911200 | -2.55923700 | -0.12893600 |
| C | -5.71367900 | 3.35045600  | -1.03876700 |
| C | -5.34620500 | -3.11630300 | -1.38838100 |
| C | -5.71340100 | -3.35098300 | 1.03850700  |
| C | -5.07807800 | 4.48759400  | 1.44808800  |
| H | -4.84212200 | 4.94330300  | 2.40378700  |
| C | -3.94693900 | 2.30574600  | 3.34707900  |
| H | -3.16516600 | 1.94999100  | 2.67051700  |
| H | -3.94655000 | 1.66065900  | 4.23026400  |
| H | -3.66543000 | 3.30955200  | 3.67671500  |
| B | -5.06728200 | -0.00006200 | 0.00010600  |
| C | -5.33061100 | 2.29430700  | 2.67279300  |
| H | -5.55885300 | 1.25835700  | 2.41249300  |
| C | -5.32993300 | -2.29372700 | -2.67271900 |
| H | -5.55800400 | -1.25781000 | -2.41207800 |
| C | -6.08693300 | -2.77616000 | 2.40262700  |
| H | -6.15357000 | -1.69027400 | 2.30428500  |
| C | -5.44336000 | 4.71679600  | -0.91797100 |
| H | -5.49085900 | 5.35036000  | -1.79711500 |
| C | -6.08687300 | 2.77519300  | -2.40278300 |
| H | -6.15285300 | 1.68927800  | -2.30428400 |
| C | -5.12235000 | 5.28169800  | 0.30993200  |
| H | -4.91726500 | 6.34489900  | 0.38120800  |
| C | -5.12149100 | -5.28173700 | -0.31061800 |
| H | -4.91618200 | -6.34487700 | -0.38216500 |
| C | -5.07712000 | -4.48729300 | -1.44853000 |
| H | -4.84096400 | -4.94271100 | -2.40431600 |
| C | -5.44285300 | -4.71724500 | 0.91738100  |
| H | -5.49041600 | -5.35105800 | 1.79634200  |
| C | -6.42436200 | 2.76247800  | 3.65040800  |
| H | -6.25501700 | 3.78894000  | 3.98677800  |
| H | -6.44232600 | 2.12420800  | 4.53829900  |
| H | -7.41450700 | 2.72441200  | 3.18987800  |
| C | -7.47121600 | -3.27790500 | 2.85535900  |
| H | -8.24602900 | -3.03578700 | 2.12404700  |
| H | -7.75416200 | -2.81893200 | 3.80670300  |

|   |             |             |             |
|---|-------------|-------------|-------------|
| H | -7.47783700 | -4.36240800 | 2.99520100  |
| C | -7.47146100 | 3.27605700  | -2.85555600 |
| H | -8.24612600 | 3.03350200  | -2.12423500 |
| H | -7.75411400 | 2.81685600  | -3.80687800 |
| H | -7.47872400 | 4.36054900  | -2.99543900 |
| C | -5.02520000 | -3.07277800 | 3.47713600  |
| H | -4.92937700 | -4.14342800 | 3.67503800  |
| H | -5.29624300 | -2.59179000 | 4.42087000  |
| H | -4.03771100 | -2.70100800 | 3.18874600  |
| C | -5.02534900 | 3.07227700  | -3.47736500 |
| H | -4.93032900 | 4.14293200  | -3.67563200 |
| H | -5.29601600 | 2.59077700  | -4.42094300 |
| H | -4.03759100 | 2.70135400  | -3.18882200 |
| C | -3.94639000 | -2.30512600 | -3.34726500 |
| H | -3.16445400 | -1.94960300 | -2.67079800 |
| H | -3.66499900 | -3.30887100 | -3.67724000 |
| C | -6.42393500 | -2.76155400 | -3.65024000 |
| H | -6.25482000 | -3.78801900 | -3.98673900 |
| H | -6.44193200 | -2.12318100 | -4.53806000 |
| H | -7.41400700 | -2.72338000 | -3.18955700 |
| N | 5.92536900  | -1.14734600 | -0.03233800 |
| N | 3.57823900  | 0.00000600  | -0.00007800 |
| N | 5.92521200  | 1.14760700  | 0.03192400  |
| C | 0.71397300  | -0.00000400 | -0.00002500 |
| C | 7.24688900  | -0.67444200 | -0.02066700 |
| H | 8.08143400  | -1.35632300 | -0.05165200 |
| C | 2.85444800  | 1.06904100  | -0.48511600 |
| H | 3.43218000  | 1.90042600  | -0.85897700 |
| C | 7.24679400  | 0.67489300  | 0.02005700  |
| H | 8.08125200  | 1.35689100  | 0.05079800  |
| C | 1.49275800  | -1.09211000 | 0.49409400  |
| H | 1.02441900  | -1.97934800 | 0.89789800  |
| C | 5.64949300  | -2.55906800 | -0.12880100 |
| C | 2.85447600  | -1.06902300 | 0.48500200  |
| H | 3.43221700  | -1.90039900 | 0.85887600  |
| C | 5.34692200  | -3.11659700 | -1.38811600 |
| C | 1.49273300  | 1.09211400  | -0.49416700 |
| H | 1.02436700  | 1.97934100  | -0.89796400 |
| C | 5.64911500  | 2.55924800  | 0.12882000  |
| C | 5.71369800  | -3.35041200 | 1.03892100  |
| C | 5.34627300  | 3.11638100  | 1.38824900  |
| C | 5.71336100  | 3.35093200  | -1.03866500 |
| C | 5.07808800  | -4.48765500 | -1.44788400 |
| H | 4.84212800  | -4.94340400 | -2.40356300 |

|   |            |             |             |
|---|------------|-------------|-------------|
| C | 3.94692000 | -2.30588300 | -3.34694700 |
| H | 3.16515400 | -1.95010100 | -2.67039200 |
| H | 3.94651900 | -1.66083000 | -4.23015900 |
| H | 3.66540800 | -3.30970200 | -3.67654000 |
| B | 5.06727900 | 0.00006400  | -0.00010300 |
| C | 5.33059900 | -2.29441400 | -2.67267800 |
| H | 5.55884100 | -1.25845400 | -2.41241900 |
| C | 5.32999400 | 2.29386600  | 2.67262000  |
| H | 5.55823100 | 1.25796800  | 2.41205500  |
| C | 6.08686800 | 2.77603800  | -2.40276100 |
| H | 6.15344200 | 1.69015100  | -2.30437700 |
| C | 5.44338700 | -4.71675900 | 0.91818200  |
| H | 5.49089700 | -5.35028700 | 1.79735100  |
| C | 6.08690900 | -2.77509500 | 2.40291000  |
| H | 6.15286900 | -1.68918200 | 2.30437200  |
| C | 5.12237000 | -5.28171200 | -0.30969600 |
| H | 4.91729100 | -6.34491800 | -0.38092700 |
| C | 5.12151600 | 5.28176000  | 0.31038400  |
| H | 4.91621000 | 6.34490400  | 0.38188400  |
| C | 5.07719800 | 4.48737600  | 1.44834200  |
| H | 4.84107500 | 4.94284300  | 2.40411400  |
| C | 5.44282200 | 4.71720200  | -0.91759900 |
| H | 5.49035800 | 5.35096800  | -1.79659400 |
| C | 6.42434100 | -2.76262000 | -3.65028700 |
| H | 6.25499300 | -3.78909400 | -3.98661800 |
| H | 6.44229400 | -2.12438200 | -4.53820100 |
| H | 7.41449000 | -2.72453500 | -3.18976900 |
| C | 7.47118600 | 3.27768800  | -2.85549200 |
| H | 8.24597700 | 3.03554000  | -2.12416700 |
| H | 7.75411400 | 2.81867800  | -3.80682300 |
| H | 7.47787000 | 4.36218800  | -2.99535600 |
| C | 7.47151500 | -3.27592000 | 2.85567100  |
| H | 8.24616000 | -3.03337500 | 2.12432500  |
| H | 7.75417900 | -2.81668300 | 3.80697200  |
| H | 7.47879900 | -4.36040700 | 2.99558900  |
| C | 5.02516800 | 3.07267500  | -3.47729700 |
| H | 4.92942500 | 4.14332000  | -3.67526100 |
| H | 5.29619100 | 2.59161700  | -4.42100200 |
| H | 4.03765000 | 2.70099100  | -3.18890100 |
| C | 5.02541300 | -3.07216100 | 3.47752400  |
| H | 4.93042000 | -4.14281000 | 3.67583400  |
| H | 5.29608900 | -2.59062000 | 4.42107900  |
| H | 4.03764000 | -2.70127100 | 3.18898800  |
| C | 3.94636500 | 2.30513400  | 3.34701700  |

|   |             |             |             |
|---|-------------|-------------|-------------|
| H | 3.16453000  | 1.94955500  | 2.67044200  |
| H | 3.94605400  | 1.65983400  | 4.23004900  |
| H | 3.66487100  | 3.30885700  | 3.67693700  |
| C | 6.42382100  | 2.76185500  | 3.65025600  |
| H | 6.25456200  | 3.78831100  | 3.98671100  |
| H | 6.44178000  | 2.12351600  | 4.53810200  |
| H | 7.41395300  | 2.72377000  | 3.18969600  |
| H | -3.94613000 | -1.65977400 | -4.23034400 |

$\mathbf{1}^{2+}$  calculated at the B3LYP/6-311G(d) level.

|   |            |             |             |
|---|------------|-------------|-------------|
| N | 5.90646100 | 1.10677100  | -0.31286500 |
| N | 3.55220400 | 0.00000000  | 0.00000000  |
| N | 5.90646000 | -1.10677100 | 0.31286600  |
| C | 5.62725100 | 2.45816400  | -0.75208900 |
| C | 0.73326100 | 0.00000000  | -0.00000100 |
| C | 7.21668700 | 0.65264200  | -0.18908200 |
| H | 8.05383800 | 1.30180200  | -0.39017900 |
| C | 1.47332900 | -1.19103200 | -0.08835100 |
| H | 0.98754800 | -2.15750500 | -0.13270500 |
| C | 5.62724900 | -2.45816500 | 0.75209100  |
| C | 2.84969600 | -1.16679600 | -0.08821600 |
| H | 3.43255600 | -2.07412500 | -0.14755500 |
| C | 7.21668600 | -0.65264300 | 0.18908500  |
| H | 8.05383700 | -1.30180300 | 0.39018200  |
| C | 1.47332900 | 1.19103300  | 0.08834900  |
| H | 0.98754900 | 2.15750600  | 0.13270300  |
| C | 5.63168900 | -3.49681900 | -0.20437700 |
| C | 5.38483300 | -2.69318200 | 2.12110800  |
| C | 2.84969600 | 1.16679700  | 0.08821500  |
| H | 3.43255600 | 2.07412500  | 0.14755500  |
| C | 5.63168700 | 3.49681900  | 0.20437900  |
| C | 5.38484000 | 2.69318200  | -2.12110700 |
| C | 5.10824900 | -4.00769600 | 2.51081200  |
| H | 4.92321700 | -4.22586500 | 3.55677900  |
| C | 5.96160400 | -3.26698000 | -1.67747900 |
| H | 6.03339900 | -2.18937200 | -1.84755000 |
| C | 5.44526300 | -1.59456500 | 3.17817400  |
| H | 5.66708600 | -0.64906200 | 2.67641000  |
| C | 5.35380000 | -4.79073800 | 0.24761400  |
| H | 5.36028300 | -5.61495800 | -0.45683300 |
| C | 5.35379900 | 4.79073700  | -0.24761200 |
| H | 5.36027900 | 5.61495700  | 0.45683500  |

|   |             |             |             |
|---|-------------|-------------|-------------|
| C | 5.10825700  | 4.00769700  | -2.51081200 |
| H | 4.92322900  | 4.22586600  | -3.55678000 |
| C | 5.08864400  | 5.04512800  | -1.58769700 |
| H | 4.88347900  | 6.05847100  | -1.91594000 |
| C | 5.96159700  | 3.26697900  | 1.67748200  |
| H | 6.03338500  | 2.18937000  | 1.84755400  |
| C | 5.44527300  | 1.59456600  | -3.17817300 |
| H | 5.66709400  | 0.64906200  | -2.67640900 |
| C | 5.08864000  | -5.04512800 | 1.58769700  |
| H | 4.88347400  | -6.05847100 | 1.91594000  |
| B | 5.05693700  | 0.00000000  | 0.00000000  |
| C | 7.33154100  | -3.87513000 | -2.03539600 |
| H | 8.12926200  | -3.47394300 | -1.40591000 |
| H | 7.58653400  | -3.65995100 | -3.07615900 |
| H | 7.33109300  | -4.96111300 | -1.91208400 |
| C | 4.86792200  | 3.80427000  | 2.61833900  |
| H | 4.76816400  | 4.89026800  | 2.55458800  |
| H | 5.10966600  | 3.56329200  | 3.65645100  |
| H | 3.88693000  | 3.37033100  | 2.39864000  |
| C | 4.86792700  | -3.80426400 | -2.61833700 |
| H | 4.76815800  | -4.89026100 | -2.55458400 |
| H | 5.10967400  | -3.56329000 | -3.65645000 |
| H | 3.88693700  | -3.37031600 | -2.39864200 |
| C | 7.33153800  | 3.87512000  | 2.03540100  |
| H | 8.12925700  | 3.47392600  | 1.40591700  |
| H | 7.58652700  | 3.65994200  | 3.07616400  |
| H | 7.33109700  | 4.96110200  | 1.91208600  |
| C | 4.10093800  | 1.42238200  | -3.90864900 |
| H | 3.28303100  | 1.21291700  | -3.21144000 |
| H | 4.15547000  | 0.59410600  | -4.61993400 |
| H | 3.82805100  | 2.31749500  | -4.47294900 |
| C | 6.58678700  | 1.84725900  | -4.18102000 |
| H | 6.42570700  | 2.76250500  | -4.75598600 |
| H | 6.65965600  | 1.02083300  | -4.89270000 |
| H | 7.55092700  | 1.94056500  | -3.67599100 |
| C | 4.10092500  | -1.42238100 | 3.90864500  |
| H | 3.28302000  | -1.21291600 | 3.21143400  |
| H | 4.15545500  | -0.59410500 | 4.61993100  |
| H | 3.82803600  | -2.31749400 | 4.47294400  |
| C | 6.58677300  | -1.84725900 | 4.18102500  |
| H | 6.42569200  | -2.76250500 | 4.75599000  |
| H | 6.65964000  | -1.02083300 | 4.89270500  |
| H | 7.55091500  | -1.94056500 | 3.67599800  |
| N | -5.91116500 | -1.11784700 | -0.27013900 |

|   |             |             |             |
|---|-------------|-------------|-------------|
| N | -3.55818700 | 0.00000100  | -0.00000100 |
| N | -5.91116500 | 1.11784700  | 0.27013600  |
| C | -5.62662700 | -2.51018900 | -0.54695600 |
| C | -0.73970400 | 0.00000100  | -0.00000100 |
| C | -7.22178700 | -0.66153900 | -0.15511300 |
| H | -8.05900100 | -1.32599300 | -0.29734300 |
| C | -1.47975200 | 0.98210000  | 0.67987000  |
| H | -0.99385100 | 1.75821800  | 1.25737400  |
| C | -5.62662700 | 2.51018900  | 0.54695500  |
| C | -2.85601600 | 0.95671700  | 0.67387900  |
| H | -3.43865600 | 1.69424500  | 1.20583100  |
| C | -7.22178700 | 0.66154000  | 0.15510800  |
| H | -8.05900100 | 1.32599400  | 0.29733700  |
| C | -1.47975200 | -0.98209800 | -0.67987200 |
| H | -0.99385100 | -1.75821600 | -1.25737600 |
| C | -5.64048300 | 2.95232300  | 1.88788000  |
| C | -5.36706300 | 3.37985900  | -0.53214100 |
| C | -2.85601600 | -0.95671500 | -0.67388100 |
| H | -3.43865600 | -1.69424400 | -1.20583300 |
| C | -5.64048300 | -2.95232400 | -1.88788000 |
| C | -5.36706400 | -3.37985800 | 0.53214100  |
| C | -5.08138200 | 4.71536600  | -0.23025300 |
| H | -4.88409400 | 5.41358200  | -1.03620900 |
| C | -5.99191700 | 2.03827800  | 3.05959300  |
| H | -6.06960700 | 1.01473200  | 2.68327800  |
| C | -5.42189600 | 2.93634500  | -1.99107900 |
| H | -5.65204900 | 1.86803200  | -2.01551900 |
| C | -5.35248600 | 4.30008800  | 2.12543400  |
| H | -5.36522500 | 4.67726900  | 3.14187400  |
| C | -5.35248800 | -4.30009000 | -2.12543300 |
| H | -5.36522700 | -4.67727200 | -3.14187300 |
| C | -5.08138400 | -4.71536500 | 0.23025500  |
| H | -4.88409700 | -5.41358000 | 1.03621100  |
| C | -5.06935100 | -5.17206500 | -1.08128500 |
| H | -4.85698000 | -6.21520200 | -1.28985800 |
| C | -5.99191600 | -2.03828100 | -3.05959500 |
| H | -6.06960800 | -1.01473400 | -2.68328100 |
| C | -5.42189600 | -2.93634100 | 1.99107800  |
| H | -5.65205200 | -1.86803000 | 2.01551800  |
| C | -5.06934900 | 5.17206400  | 1.08128700  |
| H | -4.85697700 | 6.21520100  | 1.28986100  |
| B | -5.06255100 | 0.00000000  | -0.00000100 |
| C | -7.36512600 | 2.40916100  | 3.65253200  |
| H | -8.15474500 | 2.37340400  | 2.89832400  |

|   |             |             |             |
|---|-------------|-------------|-------------|
| H | -7.63626800 | 1.71712500  | 4.45381000  |
| H | -7.35923500 | 3.41771400  | 4.07366400  |
| C | -4.91073900 | -2.03949000 | -4.15553100 |
| H | -4.80651400 | -3.01834500 | -4.62919100 |
| H | -5.16890700 | -1.32672200 | -4.94258500 |
| H | -3.92774000 | -1.75701200 | -3.76465900 |
| C | -4.91074100 | 2.03948600  | 4.15553100  |
| H | -4.80651700 | 3.01834100  | 4.62919300  |
| H | -5.16890900 | 1.32671700  | 4.94258300  |
| H | -3.92774100 | 1.75701100  | 3.76465900  |
| C | -7.36512400 | -2.40916500 | -3.65253600 |
| H | -8.15474500 | -2.37340800 | -2.89832800 |
| H | -7.63626600 | -1.71712900 | -4.45381500 |
| H | -7.35923300 | -3.41771900 | -4.07366700 |
| C | -4.07194300 | -3.13149600 | 2.70513200  |
| H | -3.26141700 | -2.60177600 | 2.19380100  |
| H | -4.12331400 | -2.75562000 | 3.73029200  |
| H | -3.79043800 | -4.18602100 | 2.75961600  |
| C | -6.55356500 | -3.65478600 | 2.74986000  |
| H | -6.38422800 | -4.73304300 | 2.80380900  |
| H | -6.62323600 | -3.28137300 | 3.77480200  |
| H | -7.52163600 | -3.49672900 | 2.26908200  |
| C | -4.07194500 | 3.13150400  | -2.70513500 |
| H | -3.26141600 | 2.60178700  | -2.19380500 |
| H | -4.12331600 | 2.75562800  | -3.73029400 |
| H | -3.79044200 | 4.18603000  | -2.75961900 |
| C | -6.55356800 | 3.65478700  | -2.74985800 |
| H | -6.38423500 | 4.73304400  | -2.80380400 |
| H | -6.62323900 | 3.28137600  | -3.77480000 |
| H | -7.52163800 | 3.49672500  | -2.26907900 |

**2'-CS** calculated at the BH&HLYP/def2-SVP level.

|   |            |             |             |
|---|------------|-------------|-------------|
| N | 5.67409400 | 1.31376000  | -0.39231800 |
| N | 3.55363400 | -0.10269200 | 0.02412700  |
| N | 6.01907500 | -0.88019400 | 0.17319100  |
| C | 5.17938200 | 2.57017600  | -0.79646100 |
| C | 1.37650000 | 0.74117100  | 0.60900900  |
| C | 0.69640800 | -0.44619000 | 0.06064800  |
| C | 2.71768300 | 0.85087900  | 0.57718100  |
| H | 3.21817500 | 1.67448900  | 1.07118900  |

|   |             |             |             |
|---|-------------|-------------|-------------|
| C | 2.94197600  | -1.26704300 | -0.41756900 |
| H | 3.60719200  | -1.98663700 | -0.87624400 |
| C | 5.75735800  | 3.74304300  | -0.31220300 |
| C | 7.04459900  | 1.04468500  | -0.34214000 |
| H | 7.77876200  | 1.80251600  | -0.56861000 |
| C | 1.61339900  | -1.50223000 | -0.37264100 |
| C | 4.11716200  | 2.65978500  | -1.69491700 |
| C | 5.94573900  | -2.21576900 | 0.61759700  |
| C | 0.62828500  | 1.70224000  | 1.49401300  |
| H | 1.29821600  | 2.47354900  | 1.88107600  |
| H | 0.20757700  | 1.15564100  | 2.34557600  |
| H | -0.21162000 | 2.20073600  | 1.00970000  |
| C | 7.24576700  | -0.24122500 | -0.02888800 |
| H | 8.18227900  | -0.76192400 | 0.09946000  |
| C | 6.75904100  | -3.19326900 | 0.04578500  |
| C | 1.14131800  | -2.77467600 | -1.02108300 |
| H | 0.99616200  | -3.58449800 | -0.30538900 |
| H | 1.87384100  | -3.12212600 | -1.75256200 |
| H | 0.19328100  | -2.61750500 | -1.54061800 |
| C | 5.07206400  | -2.57625700 | 1.64231600  |
| C | 3.64076000  | 3.90009600  | -2.09128300 |
| H | 2.81221700  | 3.95232000  | -2.78922500 |
| C | 6.70340500  | -4.50424000 | 0.49609700  |
| H | 7.34309600  | -5.25257400 | 0.04067800  |
| B | 4.98579000  | 0.09426300  | -0.06018300 |
| C | 5.28553100  | 4.98062100  | -0.72486200 |
| H | 5.74672700  | 5.88328200  | -0.33866300 |
| C | 4.22296900  | 5.06640400  | -1.61322000 |
| H | 3.85102100  | 6.03408800  | -1.93061400 |
| C | 5.01068500  | -3.89130500 | 2.07718000  |
| H | 4.32427900  | -4.15602900 | 2.87414700  |
| C | 5.82712000  | -4.86125900 | 1.51116700  |
| H | 5.78035800  | -5.88721800 | 1.85865300  |
| N | -5.67409800 | 1.31375500  | 0.39231200  |
| N | -3.55363400 | -0.10269400 | -0.02412100 |
| N | -6.01907300 | -0.88020000 | -0.17319800 |
| C | -5.17938900 | 2.57017200  | 0.79645600  |
| C | -1.37650000 | 0.74117000  | -0.60899900 |
| C | -0.69640800 | -0.44619000 | -0.06063600 |
| C | -2.71768300 | 0.85087700  | -0.57717400 |
| H | -3.21817400 | 1.67448600  | -1.07118400 |
| C | -2.94197600 | -1.26704300 | 0.41757800  |
| H | -3.60719300 | -1.98663700 | 0.87625300  |
| C | -5.75736100 | 3.74303800  | 0.31219300  |



|   |             |             |             |
|---|-------------|-------------|-------------|
| C | -7.04460200 | 1.04467900  | 0.34212500  |
| H | -7.77876700 | 1.80250900  | 0.56859100  |
| C | -1.61339900 | -1.50222900 | 0.37265300  |
| C | -4.11717600 | 2.65978100  | 1.69492100  |
| C | -5.94573300 | -2.21577500 | -0.61760300 |
| C | -0.62828400 | 1.70224000  | -1.49400200 |
| H | 0.21161900  | 2.20073700  | -1.00968900 |
| H | -1.29821500 | 2.47354700  | -1.88106700 |
| H | -0.20757400 | 1.15564000  | -2.34556400 |
| C | -7.24576700 | -0.24123100 | 0.02887300  |
| H | -8.18227700 | -0.76193100 | -0.09948200 |
| C | -6.75903800 | -3.19327500 | -0.04579700 |
| C | -1.14131800 | -2.77467400 | 1.02109800  |
| H | -0.99616100 | -3.58449700 | 0.30540600  |
| H | -1.87384200 | -3.12212300 | 1.75257700  |
| H | -0.19328200 | -2.61750100 | 1.54063400  |
| C | -5.07204900 | -2.57626200 | -1.64231500 |
| C | -3.64077700 | 3.90009300  | 2.09128900  |
| H | -2.81224000 | 3.95231800  | 2.78923800  |
| C | -6.70339700 | -4.50424600 | -0.49610800 |
| H | -7.34309200 | -5.25258000 | -0.04069400 |
| B | -4.98579100 | 0.09425900  | 0.06018200  |
| C | -5.28553700 | 4.98061700  | 0.72485500  |
| H | -5.74673000 | 5.88327700  | 0.33865000  |
| C | -4.22298200 | 5.06640000  | 1.61322100  |
| H | -3.85103700 | 6.03408500  | 1.93061700  |
| C | -5.01066600 | -3.89131000 | -2.07717800 |
| H | -4.32425300 | -4.15603400 | -2.87413900 |
| C | -5.82710500 | -4.86126400 | -1.51117100 |
| H | -5.78033900 | -5.88722400 | -1.85865600 |
| H | 4.44476900  | -1.82031900 | 2.09787600  |
| H | 6.57051100  | 3.68268000  | 0.40200900  |
| H | 7.42676700  | -2.92511400 | -0.76490900 |
| H | 3.66964700  | 1.75368500  | -2.08350500 |
| H | -3.66966400 | 1.75368200  | 2.08351300  |
| H | -6.57050800 | 3.68267400  | -0.40202500 |
| H | -4.44475100 | -1.82032400 | -2.09787000 |
| H | -7.42677100 | -2.92511900 | 0.76489100  |

**2'-OS** calculated at the UBH&HLYP/def2-SVP level.

|   |             |             |             |
|---|-------------|-------------|-------------|
| N | -5.89921500 | 1.06721600  | 0.13848200  |
| N | -3.58099300 | -0.07737100 | 0.03945200  |
| N | -5.90170900 | -1.22029800 | -0.00769600 |

|   |             |             |             |
|---|-------------|-------------|-------------|
| C | -5.60989000 | 2.43490700  | 0.31427000  |
| C | -1.49940500 | 0.90419600  | -0.70751900 |
| C | -0.73557500 | -0.07787500 | 0.00801400  |
| C | -2.85785100 | 0.87537400  | -0.67681700 |
| H | -3.44839800 | 1.57486100  | -1.25308300 |
| C | -2.84253900 | -1.03047400 | 0.73944300  |
| H | -3.42043900 | -1.72982900 | 1.32854400  |
| C | -6.32822700 | 3.40262700  | -0.38709700 |
| C | -7.21356200 | 0.59238300  | 0.11398800  |
| H | -8.05808200 | 1.26107300  | 0.17907700  |
| C | -1.48374800 | -1.05976500 | 0.74013100  |
| C | -4.61310500 | 2.84184000  | 1.20003200  |
| C | -5.61745700 | -2.58822200 | -0.18982800 |
| C | -0.81870200 | 1.90721700  | -1.59467600 |
| H | -1.54521400 | 2.56349100  | -2.07830200 |
| H | -0.24171500 | 1.39975000  | -2.37398900 |
| H | -0.11108200 | 2.53325200  | -1.04716100 |
| C | -7.21482400 | -0.74446600 | 0.04612200  |
| H | -8.06109000 | -1.41251800 | -0.00010800 |
| C | -6.32066000 | -3.55533600 | 0.52753100  |
| C | -0.78401200 | -2.06312100 | 1.61196300  |
| H | -0.08916300 | -2.68962600 | 1.04885800  |
| H | -1.49995400 | -2.71894500 | 2.11169200  |
| H | -0.18948600 | -1.55597800 | 2.37819100  |
| C | -4.64111100 | -2.99598600 | -1.09768900 |
| C | -4.33923800 | 4.19007600  | 1.37157600  |
| H | -3.55963200 | 4.49000100  | 2.06346100  |
| C | -6.05673800 | -4.90342500 | 0.33399500  |
| H | -6.61327600 | -5.64270100 | 0.90002700  |
| B | -5.02823800 | -0.07687200 | 0.05564900  |
| C | -6.05891900 | 4.75049300  | -0.19950000 |
| H | -6.62741200 | 5.49024800  | -0.75288500 |
| C | -5.06137900 | 5.15178100  | 0.67775500  |
| H | -4.84804800 | 6.20527600  | 0.81982400  |
| C | -4.37227800 | -4.34445400 | -1.27529200 |
| H | -3.60864900 | -4.64504400 | -1.98449000 |
| C | -5.07947400 | -5.30555000 | -0.56541700 |
| H | -4.87026100 | -6.35922300 | -0.71221000 |
| N | 5.89921800  | 1.06722100  | -0.13845900 |
| N | 3.58099400  | -0.07736300 | -0.03945600 |
| N | 5.90170800  | -1.22029300 | 0.00771800  |
| C | 5.60989600  | 2.43491300  | -0.31424900 |
| C | 1.49940100  | 0.90420200  | 0.70750400  |
| C | 0.73557600  | -0.07787100 | -0.00803200 |

|   |             |             |             |
|---|-------------|-------------|-------------|
| C | 2.85784600  | 0.87538300  | 0.67680800  |
| H | 3.44838900  | 1.57487200  | 1.25307500  |
| C | 2.84254500  | -1.03046500 | -0.73945100 |
| H | 3.42044900  | -1.72981900 | -1.32855100 |
| C | 6.32822000  | 3.40263200  | 0.38713200  |
| C | 7.21356400  | 0.59238800  | -0.11394900 |
| H | 8.05808500  | 1.26107800  | -0.17902700 |
| C | 1.48375400  | -1.05975900 | -0.74014600 |
| C | 4.61312600  | 2.84184700  | -1.20002600 |
| C | 5.61745400  | -2.58821700 | 0.18984700  |
| C | 0.81869200  | 1.90722300  | 1.59465500  |
| H | 0.11107400  | 2.53325700  | 1.04713500  |
| H | 1.54520000  | 2.56350000  | 2.07828300  |
| H | 0.24170200  | 1.39975700  | 2.37396600  |
| C | 7.21482500  | -0.74446100 | -0.04608200 |
| H | 8.06109000  | -1.41251300 | 0.00015800  |
| C | 6.32066900  | -3.55533100 | -0.52749900 |
| C | 0.78402400  | -2.06311500 | -1.61198300 |
| H | 0.08917300  | -2.68962100 | -1.04888200 |
| H | 1.49997000  | -2.71893800 | -2.11170900 |
| H | 0.18950200  | -1.55597200 | -2.37821300 |
| C | 4.64109100  | -2.99598000 | 1.09769100  |
| C | 4.33926100  | 4.19008300  | -1.37157300 |
| H | 3.55966700  | 4.49000900  | -2.06347000 |
| C | 6.05674400  | -4.90342100 | -0.33396700 |
| H | 6.61329300  | -5.64269700 | -0.89998800 |
| B | 5.02823900  | -0.07686600 | -0.05563700 |
| C | 6.05891400  | 4.75049700  | 0.19953400  |
| H | 6.62739800  | 5.49025100  | 0.75293000  |
| C | 5.06138900  | 5.15178700  | -0.67773700 |
| H | 4.84806100  | 6.20528200  | -0.81980700 |
| C | 4.37225600  | -4.34444800 | 1.27529000  |
| H | 3.60861400  | -4.64503800 | 1.98447400  |
| C | 5.07946400  | -5.30554500 | 0.56542800  |
| H | 4.87024900  | -6.35921800 | 0.71221800  |
| H | -4.09799800 | -2.25100300 | -1.66541000 |
| H | -7.09095500 | 3.09466000  | -1.09302200 |
| H | -7.06710000 | -3.24672300 | 1.25038000  |
| H | -4.05800600 | 2.09640700  | 1.75543400  |
| H | 4.05803600  | 2.09641500  | -1.75543900 |
| H | 7.09093600  | 3.09466300  | 1.09307000  |
| H | 4.09796800  | -2.25099700 | 1.66540200  |
| H | 7.06712200  | -3.24671900 | -1.25033600 |

2'-T calculated at the UBH&HLYP/def2-SVP level.

|   |            |             |             |
|---|------------|-------------|-------------|
| N | 5.90178800 | 1.14331600  | 0.07880900  |
| N | 3.58165800 | 0.00000600  | -0.00000600 |
| N | 5.90177700 | -1.14332700 | -0.07880700 |
| C | 5.61489200 | 2.52264900  | 0.08253000  |
| C | 1.49069500 | 0.86439100  | 0.85727600  |
| C | 0.74182000 | 0.00000800  | -0.00000200 |
| C | 2.85125400 | 0.84517000  | 0.83649000  |
| H | 3.43543700 | 1.48061100  | 1.48818100  |
| C | 2.85125100 | -0.84515600 | -0.83650200 |
| H | 3.43543100 | -1.48059600 | -1.48819600 |
| C | 6.32650200 | 3.38798400  | 0.91273500  |
| C | 7.21559200 | 0.66701800  | 0.05479000  |
| H | 8.06107100 | 1.33683800  | 0.08801500  |
| C | 1.49069100 | -0.86437500 | -0.85728400 |
| C | 4.62700600 | 3.04479100  | -0.75129400 |
| C | 5.61486900 | -2.52265700 | -0.08252900 |
| C | 0.78471500 | 1.79835800  | 1.79688300  |
| H | 1.49470600 | 2.39351800  | 2.37483200  |
| H | 0.14707000 | 1.25007400  | 2.49627900  |
| H | 0.12827600 | 2.48354900  | 1.25307100  |
| C | 7.21558600 | -0.66704200 | -0.05477900 |
| H | 8.06105800 | -1.33686900 | -0.08799900 |
| C | 6.32647600 | -3.38799900 | -0.91272900 |
| C | 0.78470700 | -1.79833800 | -1.79689200 |
| H | 0.12825100 | -2.48351500 | -1.25308200 |
| H | 1.49469600 | -2.39351400 | -2.37482800 |
| H | 0.14707900 | -1.25004900 | -2.49629900 |
| C | 4.62697100 | -3.04479000 | 0.75128700  |
| C | 4.35541900 | 4.40433500  | -0.74579900 |
| H | 3.58291700 | 4.79443500  | -1.39965200 |
| C | 6.05946100 | -4.74927100 | -0.90242000 |
| H | 6.62263800 | -5.40840500 | -1.55436300 |
| B | 5.02920400 | -0.00000100 | -0.00000200 |
| C | 6.05950000 | 4.74925800  | 0.90242400  |
| H | 6.62267800 | 5.40838700  | 1.55437100  |
| C | 5.07091900 | 5.26469100  | 0.07615100  |
| H | 4.85943500 | 6.32808700  | 0.07250300  |
| C | 4.35537000 | -4.40433100 | 0.74578900  |
| H | 3.58286000 | -4.79442400 | 1.39963600  |
| C | 5.07086900 | -5.26469400 | -0.07615500 |
| H | 4.85937400 | -6.32808700 | -0.07250900 |

|   |             |             |             |
|---|-------------|-------------|-------------|
| N | -5.90178700 | 1.14331600  | -0.07880800 |
| N | -3.58165800 | 0.00000600  | 0.00000600  |
| N | -5.90177700 | -1.14332700 | 0.07880700  |
| C | -5.61489200 | 2.52264900  | -0.08252900 |
| C | -1.49069500 | 0.86439100  | -0.85727700 |
| C | -0.74182000 | 0.00000800  | 0.00000100  |
| C | -2.85125400 | 0.84517000  | -0.83649000 |
| H | -3.43543700 | 1.48061100  | -1.48818100 |
| C | -2.85125100 | -0.84515600 | 0.83650100  |
| H | -3.43543100 | -1.48059600 | 1.48819600  |
| C | -6.32650100 | 3.38798400  | -0.91273400 |
| C | -7.21559200 | 0.66701900  | -0.05478900 |
| H | -8.06107000 | 1.33683800  | -0.08801400 |
| C | -1.49069100 | -0.86437500 | 0.85728300  |
| C | -4.62700500 | 3.04479100  | 0.75129400  |
| C | -5.61486900 | -2.52265700 | 0.08253000  |
| C | -0.78471500 | 1.79835800  | -1.79688400 |
| H | -0.12827600 | 2.48354900  | -1.25307200 |
| H | -1.49470700 | 2.39351800  | -2.37483300 |
| H | -0.14707000 | 1.25007400  | -2.49627900 |
| C | -7.21558600 | -0.66704100 | 0.05478000  |
| H | -8.06105900 | -1.33686800 | 0.08800000  |
| C | -6.32647700 | -3.38799900 | 0.91272900  |
| C | -0.78470700 | -1.79833800 | 1.79689100  |
| H | -0.12825100 | -2.48351500 | 1.25308100  |
| H | -1.49469600 | -2.39351400 | 2.37482800  |
| H | -0.14707800 | -1.25004900 | 2.49629800  |
| C | -4.62697200 | -3.04478900 | -0.75128700 |
| C | -4.35541700 | 4.40433500  | 0.74579800  |
| H | -3.58291500 | 4.79443500  | 1.39965100  |
| C | -6.05946200 | -4.74927100 | 0.90242000  |
| H | -6.62263800 | -5.40840500 | 1.55436400  |
| B | -5.02920400 | -0.00000100 | 0.00000200  |
| C | -6.05949900 | 4.74925900  | -0.90242400 |
| H | -6.62267700 | 5.40838800  | -1.55437100 |
| C | -5.07091800 | 5.26469200  | -0.07615100 |
| H | -4.85943300 | 6.32808700  | -0.07250300 |
| C | -4.35537200 | -4.40433100 | -0.74578900 |
| H | -3.58286100 | -4.79442400 | -1.39963700 |
| C | -5.07087000 | -5.26469400 | 0.07615500  |
| H | -4.85937500 | -6.32808700 | 0.07250800  |
| H | 4.07718900  | -2.38021700 | 1.40580200  |
| H | 7.08201500  | 2.98812100  | 1.57924000  |
| H | 7.08199900  | -2.98814400 | -1.57922800 |

|   |             |             |             |
|---|-------------|-------------|-------------|
| H | 4.07722300  | 2.38022400  | -1.40581300 |
| H | -4.07722200 | 2.38022400  | 1.40581300  |
| H | -7.08201500 | 2.98812200  | -1.57923900 |
| H | -4.07719100 | -2.38021700 | -1.40580200 |
| H | -7.08199800 | -2.98814300 | 1.57922900  |

## 6. References

- S1. D. Herrmannndörfer, M. Kaaz, O. Puntigam, J. Bender, M. Nieger and D. Gudat, *Eur. J. Inorg. Chem.* **2015**, 4819–4828.
- S2. A. Rang, M. Engeser, N. M. Maier, M. Nieger, W. Lindner and C. A. Schalley, *Chem. Eur. J.* 2008, **14**, 3855–3859.
- S3. O. V. Dolomanov, L. J. Bourhis, R. J. Gildea, J. A. K. Howard and H. Puschmann, *J. Appl. Cryst.* 2009, **42**, 339–341.
- S4. G. M. Sheldrick, *Acta Cryst.* 2015, **A71**, 3–8
- S5. Gaussian 16, Revision A.03, M. J. Frisch, G. W. Trucks, H. B. Schlegel, G. E. Scuseria, M. A. Robb, J. R. Cheeseman, G. Scalmani, V. Barone, G. A. Petersson, H. Nakatsuji, X. Li, M. Caricato, A. V. Marenich, J. Bloino, B. G. Janesko, R. Gomperts, B. Mennucci, H. P. Hratchian, J. V. Ortiz, A. F. Izmaylov, J. L. Sonnenberg, D. Williams-Young, F. Ding, F. Lipparini, F. Egidi, J. Goings, B. Peng, A. Petrone, T. Henderson, D. Ranasinghe, V. G. Zakrzewski, J. Gao, N. Rega, G. Zheng, W. Liang, M. Hada, M. Ehara, K. Toyota, R. Fukuda, J. Hasegawa, M. Ishida, T. Nakajima, Y. Honda, O. Kitao, H. Nakai, T. Vreven, K. Throssell, J. A. Montgomery, Jr., J. E. Peralta, F. Ogliaro, M. J. Bearpark, J. J. Heyd, E. N. Brothers, K. N. Kudin, V. N. Staroverov, T. A. Keith, R. Kobayashi, J. Normand, K. Raghavachari, A. P. Rendell, J. C. Burant, S. S. Iyengar, J. Tomasi, M. Cossi, J. M. Millam, M. Klene, C. Adamo, R. Cammi, J. W. Ochterski, R. L. Martin, K. Morokuma, O. Farkas, J. B. Foresman, D. J. Fox, Gaussian, Inc., Wallingford CT, **2016**.
- S6. T. Lu and F. Chen, *J. Comput. Chem.* 2012, **33**, 580–592
- S7. W. Humphrey, A. Dalke and K. Schulten, *J. Molec. Graphics* 1996, **14.1**, 33–38
